## 1 **Impact of disease-associated chromatin accessibility QTLs across immune cell types** 2 **and contexts**

3  
4 Zepeng Mu<sup>1,2</sup>, Haley E. Randolph<sup>1,3</sup>, Raúl Aguirre-Gamboa<sup>4</sup>, Ellen Ketter<sup>5</sup>, Anne Dumaine<sup>4</sup>,  
5 Veronica Locher<sup>6</sup>, Cary Brandolino<sup>4</sup>, Xuanyao Liu<sup>1,4,7</sup>, Daniel E. Kaufmann<sup>8,9</sup>, Luis B.  
6 Barreiro<sup>1,4,6,7,10,†</sup>, Yang I. Li<sup>1,4,7,10,†</sup>

- 7  
8 1. Committee on Genetics, Genomics & Systems Biology, University of Chicago, Chicago, IL, USA  
9 2. Center for Data Sciences, Brigham and Women's Hospital, Harvard Medical School, Boston, MA,  
10 USA  
11 3. Department of Pediatrics, Columbia University Irving Medical Center, New York, NY  
12 4. Section of Genetic Medicine, Department of Medicine, University of Chicago, Chicago, IL, USA  
13 5. Committee on Microbiology, University of Chicago, Chicago, IL, USA  
14 6. Committee on Immunology, University of Chicago, Chicago, IL, USA  
15 7. Department of Human Genetics, Department of Medicine, University of Chicago, Chicago, IL,  
16 USA  
17 8. Division of Infectious Diseases, Department of Medicine, University Hospital and University of  
18 Lausanne, Lausanne, Switzerland  
19 9. Centre de Recherche du CHUM (CRCHUM) and Département de Médecine, Université de  
20 Montréal, Montreal, QC, Canada  
21 10. CZ Biohub Chicago, Chicago, IL, USA

22  
23 † Corresponding authors

## 24 **Abstract**

25 Only a third of immune-associated loci from genome-wide association studies (GWAS) colocalize  
26 with expression quantitative trait loci (eQTLs). To learn about causal genes and mechanisms at  
27 the remaining loci, we created a unified single-cell chromatin accessibility (scATAC-seq) map in  
28 peripheral blood comprising a total of 282,424 cells from 48 individuals. Clustering and topic  
29 modeling of scATAC data identified discrete cell-types and continuous cell states, which helped  
30 reveal disease-relevant cellular contexts, and allowed mapping of genetic effects on chromatin  
31 accessibility across these contexts. We identified 37,390 chromatin accessibility QTLs (caQTL)  
32 at 10% FDR across eight cell groups and observed extensive sharing of caQTLs across immune  
33 cell contexts, finding that fewer than 20% of caQTLs are specific to a single cell type. Notably,  
34 caQTLs colocalized with ~50% more GWAS loci compared to eQTLs, helping to nominate  
35 putative causal genes for many unexplained loci. However, most GWAS-caQTL colocalizations  
36 had no detectable downstream regulatory effects on gene expression levels in the same cell type.  
37 We find evidence that the higher rates of colocalization between caQTLs and GWAS signals  
38 reflect missing disease-relevant cellular contexts among existing eQTL studies. Thus, there  
39 remains a pressing need for identifying disease-causing cellular contexts and for mapping gene  
40 regulatory variation in these cells.

41  
42

## 43 Introduction

44  
45 A major goal in complex trait genomics is to understand the biological mechanisms of trait-  
46 associated variants. To this end, a general approach has been to map molecular quantitative trait  
47 loci (molQTLs) in one or more cell types or states, and then colocalize these molQTLs with GWAS  
48 loci. GWAS loci colocalized with a molQTL are then often considered to be “explained”. To date,  
49 molQTL of gene expression levels (eQTL) have been the focus of nearly all studies. Although  
50 eQTLs have greatly improved our ability to identify genes and contexts that are impacted at many  
51 GWAS loci, over half of GWAS signals remain unexplained for most complex traits<sup>1</sup>.

52 Several groups have proposed that standard eQTL analyses from bulk samples generally  
53 identify large, but unimportant genetic effects that are shared across many cell-types<sup>2</sup>. Consistent  
54 with this view, an analysis of GTEx eQTLs – the largest collection of eQTLs which covers over 55  
55 human organs – revealed that *cis*-eQTLs only mediate ~11% of trait heritability on average<sup>3</sup>.  
56 These findings are often interpreted to suggest that many GWAS variants function through cell-  
57 type or context specific effects on gene regulation, motivating searches for eQTLs in specific cell-  
58 types and contexts (i.e. cell subtypes/state, disease conditions) that may be more relevant to the  
59 traits of interest. Indeed, several studies have now identified cell-type specific and highly transient  
60 genetic effects on gene expression level that colocalize with association signals at GWAS loci<sup>4</sup>.  
61 Even so, each study only contributes to a tiny number of additional colocalizations, raising  
62 questions as to whether this approach is effective.

63 More recently, two studies mapped chromatin phenotypes QTLs (cQTLs) and found that  
64 cQTLs substantially increased the fraction of GWAS loci that colocalizes with a molQTL<sup>5,6</sup>. For  
65 example, Aracena et al. (2024) found that chromatin accessibility QTLs (caQTLs) mediate roughly  
66 twice as much trait heritability as eQTLs and colocalize with a larger fraction of GWAS loci  
67 compared with eQTLs<sup>5</sup>. It is unclear why the rates of caQTLs colocalization are larger than that  
68 of eQTLs, especially given that caQTLs must impact gene expression levels in their causal path  
69 to influence human traits. Still, these findings, along with earlier reports that trait heritability  
70 explained by eQTL SNPs (11%-14%)<sup>7</sup> are generally smaller than that explained by SNPs in  
71 enhancer and promoter regions (24%-79%)<sup>8</sup>, suggest that mapping QTLs for chromatin-level  
72 phenotypes, such as chromatin accessibility QTLs (caQTLs), may help unravel genetic  
73 mechanism of as yet unexplained GWAS loci.

74 To test this strategy, we built a unified map of single-cell chromatin accessibility (scATAC)  
75 profiles in peripheral blood mononuclear cells (PBMCs) from 48 individuals enrolled in three  
76 independent studies<sup>9,10</sup>. We integrated these data and developed novel computational  
77 approaches to map the impact of immune-related GWAS variants on chromatin accessibility  
78 across immune cell-types, contexts, and cell trajectories. Remarkably, our caQTLs colocalize with  
79 ~50% more GWAS loci on average than bulk eQTLs, helping us to examine the genetic regulatory  
80 mechanisms that underpin previously uncolocalized immune disease-associated variants.  
81 However, by analyzing these caQTLs with immune cell-type resolved eQTLs, we find that a  
82 substantial fraction of caQTL effects do not have any eQTL effect in the corresponding cell-types  
83 or contexts. We find that these can be predicted by the lack of enhancer-promoter interactions  
84 and not by low statistical power. Thus, many genetic effects on chromatin accessibility are unlikely  
85 to be functional in most cell-types. Notably, many immune GWAS loci that colocalizes with  
86 caQTLs do not colocalize with an eQTL in any assayed cell-type, we interpret this to suggest that

87 there are many cellular contexts in which eQTL data are missing. Thus, our findings highlight the  
88 need for expanding the catalog of eQTLs in cell-types and contexts that are more relevant to  
89 disease.

## 90 Results

### 91 A harmonized map of chromatin accessibility in immune cells from 59 samples

92  
93 To obtain a comprehensive map of chromatin accessibility in peripheral blood mononuclear cells  
94 (PBMCs), we obtained and compared scATAC-seq data from participants with active COVID-19,  
95 COVID-19 convalescent donors, and healthy controls (**Supplementary Table 1**). We collected  
96 scATAC-seq data from the PBMCs of 25 unique donors, including 20 individuals hospitalized with  
97 COVID-19 (both in active disease and a subset at a convalescent stage) as well as 5 healthy  
98 controls. We obtained additional COVID-19 convalescent and healthy controls from two recently  
99 published PBMC scATAC-seq datasets of similar quality (i.e., in terms of TSS read enrichment  
100 and fragments per cell; **Extended Data Fig. 1a,b**). Specifically, we used 13 healthy control  
101 samples from Bengali, et al.<sup>9</sup> and 8 COVID-19 convalescent and 2 healthy control samples from  
102 You, et al<sup>10</sup> (**Fig. 1a**).

103 After filtering, integration using LSI, and reducedMNN harmonization, we retained 282,424  
104 high-quality cells for further analysis (**Supplementary Table 1**). To obtain a cell-type resolved  
105 map of chromatin accessibility, we first annotated cell-types using Azimuth<sup>11</sup> from previously  
106 published COVID-19 scRNA-seq data<sup>12</sup> and transferred labels to our scATAC data. We also  
107 identified 26 distinct cell clusters in this integrated dataset and confirmed that they are highly  
108 consistent with Azimuth-annotated cell-types (**Extended Data Fig. 1c**). Our final annotation has  
109 two levels of granularity: L1 annotations are later used for caQTL mapping, and contains seven  
110 major immune cell-types, while L2 annotation are used for finer-grained interpretation, and  
111 contains 21 cell-types/subtypes that are well represented in our data (**Fig. 1b-c**). We then called  
112 a unified peak set consisting of 327,746 cis-regulatory elements (peaks)<sup>13</sup>. To confirm the quality  
113 of these annotations, we assessed gene activity (GA) scores of marker genes in each cell-type  
114 and observed high gene activity (GA) scores at known marker genes: *MS4A1* in B cells, *CD3E*  
115 and *CD8A* in T cells, *NCR1* in NK cells, *S100A8* in monocytes, and *FLT3* in DC (**Fig. 1d**). We  
116 also visualized genome browser tracks for markers in L2 cell annotations, and found patterns of  
117 cell-type specific peaks that are broadly consistent with the annotated cell-types (**Fig. 1e-f**).

118  
119 We compared the three donor groups (healthy, active COVID-19, and COVID-19 convalescent)  
120 to identify differences in cell-type compositions. While the overall cell-type compositions were  
121 similar among all individuals, there were a few notable exceptions. Two groups of COVID-19  
122 patients had either expanded NK cell or monocyte populations, consistent with previous  
123 reports<sup>10,14</sup> (**Fig. 1g**). At the L2 annotation level, we found increased proportions of memory B  
124 cells in COVID-19 patients compared to healthy controls (**Extended Data Fig. 1d**).

125  
126 We next sought to obtain genotypes for scATAC-seq samples from the three harmonized datasets  
127 in order to map genetic determinants of chromatin accessibility, i.e. quantitative trait loci (caQTL).  
128 Even though one of the studies (You et al.) did not genotype individual donors, we reasoned that  
129 we could approximate low-pass whole-genome sequencing (WGS) coverage by aggregating

130 single-cell reads from each individual and adapt GLIMPSE<sup>15</sup> to accurately impute common  
131 variants in these individuals. We tested this by comparing Minimac4-imputed SNPs from  
132 genotyping arrays available from Benaglio et al. to the imputed SNPs from scATAC-seq using our  
133 GLIMPSE workflow (**Methods**). We found that genotype dosages imputed from scATAC reads  
134 and genotyping arrays were highly correlated across all reference minor-allele frequency (MAF)  
135 bins (>91%, **Fig. 1h, Extended Data Fig. 1e-g**), indicating that imputed genotypes from scATAC-  
136 reads are highly accurate and are not biased by allelic imbalance in chromatin accessibility. This  
137 allowed us to merge genotype likelihood estimates from all three studies and to perform joint  
138 imputation using GLIMPSE, resulting in a harmonized callset of 6.75 million high-quality SNPs for  
139 caQTL mapping (**Extended Data Fig. 1h**).

140  
141 Altogether, we constructed a map of accessible chromatin from 282,424 PBMCs from 59 samples  
142 with high-quality, harmonized genotype information for all individuals, enabling fully-integrated  
143 downstream analysis. Imputation using aggregated scATAC-seq reads offers high-quality  
144 genotype information and our workflow (**Data availability**) can be easily adopted for future  
145 population-scale scATAC studies.

#### 147 **Topic analysis of chromatin accessibility defines cell-types and states programs**

148 Single-cell genomics data can capture gene expression in rare cell-types as well as transitional  
149 cell states. However, typical single-cell data analysis aggregates cells into discrete clusters,  
150 masking heterogeneity among cells within the same cluster. As an alternative to clustering, we  
151 applied topic modeling to our scATAC-seq data. Topic modeling represents each cell as a grade  
152 of membership (referred to as “loadings” hereafter) to inferred topics<sup>16,17</sup>. Each topic captures an  
153 axis of variation in the data which may represent cell-types, contexts, or biological processes.  
154 This allows us to identify peaks with differential accessibility across topics, and to measure the  
155 importance of a peak to each topic (referred to as “scores” hereafter)<sup>18</sup>. As such, peaks with the  
156 highest scores in each topic often reveal their associated biological functions.

157  
158 We applied a topic modeling approach, fastTopics<sup>19</sup>, to our scATAC count matrix, and built models  
159 for six to 20 total topics (referred to as “k” hereafter, **Methods**). As expected, the number of topics  
160 greatly influences the resolution at which cell states and biological processes are captured. In our  
161 k=6 model, topics largely delineate common immune cell-types including B cells, CD4 T cells,  
162 CD8 T cells/NK cells, and monocytes. In our k=10 model, both CD8 T cells and NK cells are  
163 represented by k8, which captures the cytotoxic signatures shared between these two cell-types  
164 (**Fig. 2a**). We chose the model with 20 topics for all downstream analyses, as it captures the  
165 majority of common cell-types and recognizable cell states in our PBMC data (**Fig. 2a, Extended**  
166 **Data Fig. 2**).

167  
168 We observed that multiple topics were almost exclusively used by certain cell-types, including B  
169 cells (k1, k11), monocytes (k10, k12), and DC (k4) (**Fig. 2b**). In contrast, T cell subsets often map  
170 to more than one topic, highlighting the subtle differences across T cell subsets and cell states,  
171 and the challenges in using clusters to represent T cell states. One topic, k2, was ubiquitously  
172 present in all cell-types. Upon investigation, we found that k2 loadings are highly correlated with  
173 the TSS enrichment score. The top 3,000 peaks with the highest scores in k2 are over-

174 represented in promoter regions ( $p$ -value  $< 2e-16$ , hypergeometric test; **Extended Data Fig. 3a,b**),  
175 suggesting that k2 likely represents single-cell data quality rather than biological variation.

176  
177 To functionally annotate the different topics, we derived gene-level scores in each topic from the  
178 peak-level scores. We tested four different peak-to-gene mapping strategies and found that  
179 distance-based exponential weighting function from ArchR performed the best on our  
180 benchmarking (**Extended Data Fig. 3c, Methods**)<sup>20</sup>. Using this strategy, we identified a set of  
181 genes driving each topic and we observed well-known cell-type markers among the highest-  
182 scoring genes, including *EBF1* and *CD83* for naive B cells (k1); *CD27* and *TNFSF9* for memory  
183 B cells (k11); *CD247* and *ZBTB16* for NK cells (k8); *S1PR5*, *KLRD1*, *PRF1* and *TBX21* for  
184 cytotoxic CD8 T cells (k3); and *ICOS* and *CTLA4* for Treg cells (k20) (**Fig. 2c, Supplementary**  
185 **Table 2**). The high-scoring genes in each topic were also enriched in relevant biological process  
186 gene sets (**Extended Data Fig. 3d; Supplementary Table 3**). Finally, we tested the enrichment  
187 of transcription factor (TF) binding motifs in the top 3,000 peaks with the highest scores for each  
188 topic (**Supplementary Table 4**). Again, TFs known for immune cell-types and states show  
189 significant enrichment in the corresponding topics (**Extended Data Fig. 3e**).

190  
191 Cell transitions from one state to another (e.g. during disease progression) generally exhibit a  
192 continuous rather than a discrete change in gene expression<sup>21,22</sup>. We reasoned that the loading  
193 of topics corresponding to a cell state transition captures the cell trajectory along possible  
194 transitions. Indeed, we identified evidence that topic k1 loadings represent the transition between  
195 naive B cells to memory B cells (**Methods**). For example, we observed progressive enrichment  
196 of non-naive B cells (including memory B cells and plasmablasts) along the k1 trajectory (**Fig. 2d**,  
197 top). We also adapted the ArchR getTrajectory algorithm to identify genes with changing activities  
198 along memory B cell trajectory and observed decreasing GA scores for naive B cell marker genes  
199 (*IL4R*, *TCL1A*, *IGHM*, *IGHD*) and increasing GA scores for memory B cells marker genes (*AIM2*,  
200 *CD27*, *COCH*) (**Fig. 2d**, bottom) (**Supplementary Table 5**). Thus, cell loadings from our topic  
201 modeling effectively and directly capture biologically-meaningful trajectories along cell states.

202  
203 Finally, we determined the relevance of each topic in terms of explaining complex disease  
204 heritability. We used stratified LD score regression (s-LDSC)<sup>8</sup> to calculate heritability enrichment  
205 of each topic across 50 GWAS traits (**Supplementary Table 6**). As expected, we observed  
206 greater  $h^2_g$  enrichment in many immune-related diseases and blood phenotypes compared to  
207 height, a trait used as negative control. Notably, we found large  $h^2_g$  enrichment for three  
208 autoimmune diseases (RA, systemic lupus erythematosus [SLE] and multiple sclerosis [MS]) in  
209 the lymphoid-related topics (**Fig. 2e**). For SLE, B cell topics (k1 and k11) are the most enriched,  
210 consistent with the known role of B cells in SLE etiology<sup>23,24</sup>. In addition, monocyte and myeloid-  
211 related GWAS (MONO%, MONO#, GRAN%MYELOID) are enriched in monocyte-related topics  
212 (k5, k9, k10, k12, k13, k15; **Fig. 2e**), in line with the expectation that cellular programs in  
213 monocytes causally regulate myeloid cell numbers and proportions. Interestingly, we found that  
214 one topic, k17—which was found in some CD8 T and non-classical T cells—was significantly  
215 enriched for heritability for both hospitalized and critical COVID-19 GWAS (**Fig. 2e**).

216 Thus, our analyses identify cell states and regulatory programs that likely mediate genetic  
217 risks for several complex immune traits.

218

## 219 **Topic-derived cell trajectories identify COVID-19-associated cell state continuums**

220

221 We next sought to find topics that may be associated with COVID-19. As we found k17 to be  
222 significantly enriched for COVID-19 GWAS heritability, we tested the association between k17  
223 loadings and cell donor COVID-19 status to assess whether cell donor active COVID-19 status  
224 explains a significant proportion of variation in loadings (**Methods**). Indeed, k17 is significantly  
225 enriched for COVID-19 cells (p-value = 0.023). Topic k17 largely represents CD8 TEM, and cells  
226 with high k17 loadings are disproportionately from COVID-19 donors (**Fig. 2f**, top), suggesting an  
227 expanded CD8 TEM population in COVID-19 patients.

228

229 To further investigate k17, we built a trajectory using k17 loadings and grouped cells by trajectory  
230 quintiles (**Fig. 2f**). We found that several genes previously linked to COVID-19 showed varying  
231 chromatin accessibility along the k17 trajectory (**Supplementary Table 7**). For example, we  
232 observed decreased accessibility around the *PRG4* gene body along the k17 trajectory<sup>25</sup>, while  
233 accessibility increased around *CCL3* and *CCR2*<sup>26</sup> (**Fig. 2g**). Taken together with the independent  
234 observation that high-scoring k17 peaks are enriched in COVID-19 heritability (**Fig. 2d**), our  
235 results suggest that an expanded CD8 TEM cell population in peripheral blood is a hallmark of  
236 COVID-19 and that CD8 TEM cells—or related cells—are important mediators of COVID-19 genetic  
237 risk.

238

239 More generally, we compared GA scores in COVID-19 cells across quintiles against healthy cells.  
240 COVID-19 cells in higher quintiles exhibited more differentially active genes than those in lower  
241 quintiles (**Extended Data Fig. 3f**, **Supplementary Table 8**). Notably, these differentially active  
242 genes were enriched in pathways related to chemotaxis, immune cell migration and T cell  
243 activation, consistent with the immune response upon COVID-19 infection (**Extended Data Fig.**  
244 **3g**). These findings complement our observation that k17 is enriched with COVID-19 cells and  
245 COVID-19 heritability and could not be replicated using a cluster-based approach. These results  
246 demonstrate the utility of modeling continuous cell states using a topic modeling framework.

247

## 248 **A high-resolution map of caQTLs in PBMCs**

249

250 We next used our harmonized dataset to map the impact of genetic variation on chromatin  
251 accessibility in multiple cell-types. To map caQTLs, we first used RASQUAL to model both intra-  
252 individual allelic-imbalance and inter-individual variation in chromatin accessibility for SNPs in a  
253 10 Kb window flanking the peak center in PBMCs (aggregating all cells from a donor) as well as  
254 the seven immune cell-types defined in our L1 annotation. We used phenotypic principal  
255 components (PCs), genotype PCs, and multiple quality control measurements<sup>27</sup> as covariates  
256 (**Methods**, **Extended Data Fig. 4a**). In total, we identified 37,390 caQTLs (corresponding peaks  
257 are referred as cPeaks hereafter, making up 11.7% of all tested peaks), 8,792 of which were  
258 discovered in L1 cell-types (**Fig. 3a**), but not when aggregating all PBMC cells. This far surpasses  
259 the number of significant caQTLs identified in previous studies<sup>9,28</sup>.

260

261 To verify that the caQTLs we found are likely true positives, we separately mapped PBMC caQTLs  
262 in each of the three scATAC-seq datasets. We found multiple lines of evidence indicating that the  
263 caQTLs uniquely identified in our harmonized data (“novel caQTLs”) are *bona fide* caQTLs. First,  
264 novel caQTLs showed allelic imbalance in the smaller dataset from Benaglio et al., despite being  
265 non-significant (**Fig. 3b**). Second, both our total caQTL set and novel caQTLs are strongly  
266 enriched in bulk caQTLs from lymphoblastoid cell lines (LCLs) (**Fig. 3c**)<sup>29</sup>. Finally, caQTLs in L1  
267 cell-types showed cell-type specific enrichment in eQTLs from 15 immune cell-types in the DICE  
268 consortium<sup>1,30</sup>. For instance, caQTLs in monocytes and B cells are the most enriched for eQTLs  
269 in classical/non-classical monocytes and naive B cells in DICE, respectively (**Fig. 3d**). Similarly,  
270 caQTLs in CD4 T cells were broadly enriched in eQTLs across various T cell subtypes in DICE.  
271 When visualizing the p-value distribution of caQTL SNPs in DICE eQTLs, a similar trend emerged  
272 (**Fig. 3e**). We also obtained single-cell eQTLs identified from scRNA-seq data collected from 63  
273 COVID-19 and 106 control donors, of which 25 donors overlap ours (**Randolph et al.**). Again, we  
274 found cell-type-specific enrichment of caQTLs in eQTLs in matched cell types (**Extended Data**  
275 **Fig. 4b**). Together, this evidence suggests that our caQTLs are likely to be true positives.

276  
277 The goal of our work is to determine the extent to which caQTLs can explain immune disease-  
278 associated loci. However, RASQUAL does not report effect size and standard error of identified  
279 caQTLs, which complicates statistical integration of RASQUAL caQTLs with GWAS summary  
280 statistics. Additionally, caQTLs mapped using RASQUAL are biased toward heterozygous SNPs  
281 with high read coverage, as SNPs outside peaks have weaker or no allele-specific signal, and  
282 lower phasing accuracy. To adapt single-cell caQTL data for colocalization analysis<sup>31</sup>, TWAS<sup>32,33</sup>,  
283 mashr<sup>34</sup> and meta-analysis<sup>35</sup>, we used a single-cell Poisson mixed-effects model (sc-PME)<sup>36</sup> to  
284 generate standard summary statistics of caQTL effects. In addition to providing critical statistics  
285 for downstream statistical analyses, sc-PME allows a larger mapping window (250Kb) compared  
286 to the 10Kb used in RASQUAL. This window is difficult to extend in RASQUAL because it requires  
287 haplotype phasing, which worsens as a function of distance. Yet, a larger mapping window may  
288 help capture additional significant caQTLs (**Extended Data Fig. 4c**).

289  
290 To reduce computational time and avoid inflated p-values due to high dropout rates in scATAC  
291 count data, we restricted our analysis to the 37,390 significant cPeaks from RASQUAL in PBMC  
292 and L1 cell-types. As expected, we did not find many caQTLs in underrepresented cell-types  
293 (5,006 caQTLs in DC and 3,662 caQTLs in “Other T Cells”, 10% FDR). However, in the other 5  
294 immune cell-types, we identified 10,739-22,785 caQTLs (mean: 16,297; 10% FDR). We then  
295 compared sc-PME results to those from RASQUAL, focusing specifically on the effect size  
296 estimates at top caQTL SNPs. We observed high concordance between the two approaches (e.g.  
297 98.08% in monocytes; **Fig. 3f**), supporting the validity of the sc-PME results. We also found that  
298 across L1 cell-types, an average of 79.1% of RASQUAL caQTLs are replicated by sc-PME. As  
299 anticipated, the rate of replication is lowest among rare cell-types (**Fig. 3g**). Finally, compared to  
300 a single-cell linear mixed-effects model, effect sizes from sc-PME had higher reproducibility and  
301 correlation with RASQUAL caQTLs (**Extended Data Fig. 4d**).

302  
303 We hypothesized that sc-PME would allow us to map caQTLs missed by RASQUAL owing to  
304 larger testing window sizes. To test this, we analyzed 1,337 peaks in B cells whose sc-PME lead

305 QTLs are more than 10 Kb away from the cPeak center but reside in distal chromatin accessibility  
306 peaks, as these cases are more likely to capture distal causal effects. These distal peaks are  
307 enriched in cPeaks (8.9% versus 3.4% genome-wide,  $p < 2e-16$ ; hypergeometric test), suggesting  
308 that sc-PME captures *bona fide* distal caQTLs that are missed by RASQUAL. We highlight a peak  
309 (chr10:47599729-47600229) whose lead RASQUAL caQTL is located within the cPeak itself, but  
310 the lead sc-PME caQTL is ~50 Kb upstream, is much more statistically significant, and colocalizes  
311 with an eQTL for gene *ANTXR1P1* in B cells (PP4=0.95, **Fig. 3h**). Thus, beyond providing critical  
312 summary statistics (i.e. Z-scores) that can be used for downstream statistical analyses, sc-PME  
313 can also help capture causal SNPs that are invisible to RASQUAL.

314  
315 In addition to identifying caQTLs in the L1 cell-types, we identified dynamic genetic effects along  
316 cell trajectories as defined by loadings from our topic modeling. Specifically, we tested for the  
317 linear interaction between lead caQTL in the L1 cell-types and the loadings of each topic  
318 (**Methods**), which capture a continuum of cell states along different axes of biological variation.  
319 We only mapped dynamic caQTLs in each cell type to avoid confounding with cell-type specific  
320 caQTLs. In total, we identified 4,200 peaks (Q-value < 0.01) that have at least one dynamic caQTL  
321 in one or more cell-type-topic pairs. On average, we detected 158 significant dynamic caQTL in  
322 each cell-type-topic pair and, as expected, we found that the number of cells in a topic greatly  
323 influenced the statistical power for calling dynamic caQTLs (**Fig. 3i**).

324  
325 To showcase examples of dynamic caQTLs, we highlight k17-interacting caQTLs in CD8 T cells.  
326 We divided dynamic caQTLs into two groups: (i) Consistently significant, which are significant  
327 along the entire k17 trajectory, but with varying effect sizes, and (ii) Partially significant caQTLs,  
328 which have significant effects in parts of the trajectory. The variability in the effect sizes of these  
329 caQTLs along the k17 trajectory is visualized and contrasted with that of randomly chosen non-  
330 dynamic caQTLs (likelihood-ratio test p-value > 0.5) (**Fig. 3j**). To map dynamic caQTL peaks to  
331 genes, we used the Activity-by-Contact (ABC) model and found that genes associated with k17  
332 dynamic caQTLs were enriched in immune and disease-related pathways, including natural killer  
333 cell mediated cytotoxicity (GO:0002228, p-value=2.61e-8) and regulation of lymphocyte activation  
334 (GO:0051249, p-value=3.36e-7) (**Extended Data Fig. 4e**). Additionally, several linked genes in  
335 ABC model were also implicated in the k17-associated COVID-19 genes we identified in topic  
336 analysis, including *IFNLR1*, *IL5RA*, *IL6ST*, *KLRC4*, *KLRD1*, *KLRK1*, *SYNGR1*, *TLR1* and  
337 *TNFSF14*.

338  
339 In summary, we established a map of 37,390 static and 4,200 dynamic caQTLs in PBMC and  
340 common immune cell-types. Not only do these caQTLs capture the impact of genetic variants on  
341 chromatin accessibility in common immune cell-types, but they also capture dynamic effects that  
342 manifest in important cell contexts such as cytotoxic cells. Summary statistics for all caQTLs can  
343 be readily used in standard and popular downstream analyses and are publicly available (Zenodo:  
344 TBD).

345  
346 **Sharing and specificity of caQTLs and eQTLs across cell-types and states**

347



348 Observations from single cell RNA-seq studies suggest that eQTLs and caQTLs are largely cell-  
349 type-specific<sup>9,28,37</sup>. In contrast, molQTL maps derived from bulk RNA-seq data suggest that most  
350 QTL effects are shared across cell-types<sup>1,38-40</sup>. We sought to systematically evaluate the  
351 specificity of caQTL effects across the seven immune cell-types in our L1 annotation, and to  
352 evaluate their cell-type specific impact on gene expression levels.

353  
354 We first compared the sharing of our sc-PME caQTLs. The general picture that emerged is that  
355 the majority of caQTLs are shared among all seven immune cell-types, except for monocytes, for  
356 which 42.5% of caQTLs identified were monocyte-specific. Still, only an average of 18.8% of  
357 caQTLs were cell-type specific, and this number is even lower after excluding monocytes (12.9%,  
358 **Fig. 4a**). Interestingly, these results suggest much higher QTL sharing than those obtained from  
359 RASQUAL caQTLs, for which 20,851 (68.5%) were unique to one cell-type, and merely 49  
360 caQTLs were shared in all seven cell-types (**Fig. 4b**). Thus, the discrepancies in sharing between  
361 RASQUAL and sc-PME are explained by statistical power, and further increasing QTL mapping  
362 power will yield higher estimates of sharing. We conclude that the prevalence of cell-type specific  
363 QTLs observed in single-cell genomics compared to bulk genomics data is likely explained by low  
364 QTL mapping power rather than cell-type specificity. For this reason, we used sc-PME caQTL  
365 results for all analysis below.

366  
367 Chromatin accessibility QTLs are expected to regulate promoter or enhancer activity with an effect  
368 on the expression level of one or multiple nearby genes; therefore, we asked whether our sc-PME  
369 caQTLs are also eQTLs in the DICE dataset or in the scRNA-seq dataset from matched COVID-  
370 19 patients and controls. As the DICE dataset consist of 15 bulk sorted immune cell types from  
371 ~90 individuals<sup>30</sup>, we matched the 15 cell-types/states available to five cell-types in our scATAC  
372 data (excluding DC and “Other T cells” in L1 annotation; **Extended Data Fig. 5a**). In total, we  
373 identified 6,228 unique caQTL-eQTL pairs that colocalized in at least one DICE-matching context  
374 (referred to as COLOC caQTL-eQTL pairs hereafter), including 2,635 eGenes (24% of all tested)  
375 (**Supplementary Table 9**). In comparison, when using our eQTLs from scRNA-seq of matched  
376 COVID-19 patients and controls (Randolph et al.), we found fewer caQTL-eQTL colocalizations  
377 (representing only 203 cPeaks, or 2.6% of all tested; **Fig. 4c**). This is possibly due to the sparsity  
378 of the PBMC scRNA-seq data compared to bulk RNA-seq of sorted immune cells. We therefore  
379 used caQTL colocalizations with DICE eQTLs for downstream analyses.

380  
381 We made two notable observations from this analysis. First, a very small fraction of caQTLs  
382 colocalizes with an eQTL. Across five contexts, only 4,088 cPeaks (18.6% of all tested) were  
383 colocalized with an eQTL (i.e. “eQTL-caQTL”). This suggests that the majority of caQTLs do not  
384 influence the expression level of a nearby gene in the many immune cell-types and contexts  
385 included in the DICE dataset (**Fig. 4c**). Second, even when an eQTL colocalizes with a caQTL in  
386 DICE, it often does so in just a single context. Indeed, 5,995 (84.5%) of all caQTL-eQTL pairs  
387 exist in just one context. This is in stark contrast to the widespread sharing of caQTL we observed.  
388 In fact, the majority of caQTLs shared between cell-types do not have shared colocalization with  
389 an eQTL. For example, among the 3,091 caQTLs with effects in both CD8 T cells and monocytes,  
390 only 134 were eQTL-caQTLs in both cell-types. This number is notably small considering that  
391 4,805 and 7,425 eQTL-caQTL colocalizations were identified in CD8 T cells and monocytes,

392 respectively (**Fig. 4c**). For example, cPeak chr11:60018902-60019402 has a shared caQTL in  
393 monocytes and CD8 T cells, but only colocalized with an *MS4A4A* eQTL in monocytes (**Fig. 4d**).  
394 Similarly, shared cPeak chr1:89742288-89742788 only colocalized with *GBP5* in naive CD8 T  
395 cells in DICE (**Fig. 4d**). In both cases, the lack of colocalization is attributed to the absence of  
396 eQTL signals. Thus, we find that eQTL effects are more cell-type specific compared to caQTLs  
397 at a large number of loci.

398  
399 To understand how caQTLs impact gene expression levels in a cell-type specific manner despite  
400 affecting accessibility in multiple cell-types, we sought to identify genomic factors that can predict  
401 the presence or absence of caQTL-eQTL colocalizations. To this end, we used a logistic  
402 regression model to predict caQTL-eQTL colocalization with (1) gene expression level, (2)  
403 chromatin accessibility level, (3) enhancer-to-gene links from ABC model<sup>41</sup> in matched cell-types  
404 and (4) whether a caQTL-eQTL pair colocalize in multiple cell-types. Notably, gene expression or  
405 chromatin accessibility levels were not predictive of caQTL-eQTL colocalization, suggesting that  
406 statistical power does not explain the lack of caQTL effects on gene expression levels.  
407 Interestingly, although many caQTL-eQTL colocalizations are cell-type specific, we found that a  
408 strong predictor for caQTL-eQTL colocalization in a given cell-type is the presence of a caQTL-  
409 eQTL colocalization in another cell-type (**Fig. 4e**), consistent with the notion that *cis*-regulatory  
410 elements – particularly promoters – control the same genes across cell-types. We found that the  
411 second most predictive feature was enhancer-to-gene links from the ABC model (most predictive  
412 in monocyte: log2 effect=1.007, p-value=1.63e-66; least predictive in CD8 T cell: log2 effect=0.44,  
413 p-value=4.70e-7), providing a mechanistic explanation for cell-type specific caQTL effects on  
414 gene expression levels. These findings highlight the importance of distinguishing “merely active”  
415 accessibility peaks from “functional” peaks in caQTL analyses. Critically, our observations indicate  
416 that a large fraction of caQTLs have no impact on gene expression levels in any given cell-type  
417 because they are not physically connected to any gene in that cell-type.

418  
419 We also asked whether the presence of specific TF binding motifs could predict eQTL-caQTL  
420 colocalization in a cell-type. We focused on a comparison between CD8 T cells and monocytes  
421 as many TFs driving accessibility of these two cell-types differ and have been well characterized.  
422 Interestingly, we found that, compared to all peaks as background, cPeaks with cell-type specific  
423 caQTL-eQTL colocalizations were enriched for known lineage-associated TF motifs, e.g. RUNX1,  
424 RUNX2 and CFBF in CD8 T cells, and CEBPA, CEBPB and SPIB in monocytes. By contrast, we  
425 found that shared caQTL-eQTL colocalizations are enriched for TFs with broad activity, including  
426 ELK4 and E2F1 (**Fig. 4f**). These results suggest that cell-type-specific TFs can potentiate the  
427 impact of caQTLs on gene expression in a cell-type-specific manner.

428  
429 To find potential cellular contexts in which CD8 T cell or monocyte cPeaks without eQTL  
430 colocalization might potentiate an eQTL effect, we asked whether cPeaks without any eQTL  
431 colocalization were enriched in any recognizable TF binding motifs. In CD8 T cells, we found  
432 similar enrichments for a subset of TFs (including RUNX1, RUNX2, CFBF) in cPeaks with or  
433 without eQTL colocalizations. However, motifs for another set of TFs (including EOMES, RUNX3  
434 and TBX20) were significantly enriched in cPeaks without eQTL colocalization (**Fig. 4g**, left).  
435 Notably, EOMES, RUNX3 and TBX20 are all highly enriched in accessible regions of CD8 TEM

436 cells (**Fig. 4g**, right), supporting a potential gene regulatory function of these caQTLs in CD8 TEM  
437 cells. Further supporting this possibility, EOMES regulates differentiation of effector and memory  
438 CD8 T cells, and is also implicated in exhaustion; and RUNX factors are associated with CD8 T  
439 effector/memory (TEM) populations<sup>42-44</sup>. Although DICE dataset contains eQTLs from 15 different  
440 immune cell-types including activated CD8 T cells, it lacks eQTLs from exhausted or long-term  
441 memory CD8 T cells. Thus, many cPeaks lacking eQTL colocalizations likely correspond to  
442 poised or “primed” enhancers<sup>45</sup> that can impact gene expression levels in a cell-type-specific  
443 manner through activation of cell-type-specific TFs.

444  
445 Taken together, our findings suggest that the impact of genetic variants on chromatin accessibility  
446 can be detected in many cell-types. However, whether chromatin accessibility at these regions  
447 influences gene expression levels depends on cell-type specific TFs, resulting in cell-type specific  
448 eQTL effects that are difficult to predict from caQTLs alone.

449

#### 450 **GWAS loci colocalize more often with caQTL than eQTLs**

451  
452 We sought to characterize the utility of our caQTLs for interpreting immune-related GWAS loci.  
453 We colocalized sc-PME caQTLs with GWAS of 11 immune-related diseases, two COVID-19  
454 phenotypes and 36 blood phenotypes. We compared these results with eQTL-GWAS  
455 colocalization from DICE<sup>43</sup>. In total, 56.8% (4,696 out of 8,271) of GWAS loci across all traits  
456 (GWAS-SNP pairs) colocalized either a caQTL or an eQTL (n=1,532), only caQTLs (n=2,015), or  
457 only eQTLs (n=1,149) (**Supplementary Table 10,11**).

458  
459 Among GWAS loci that colocalizes with both, we found an RA locus<sup>46</sup> that colocalizes with a  
460 *PVRIG* eQTL in Tfh and Tregs, and a caQTL in CD4 T cells. *PVRIG* (also known as *CD112R*) is  
461 a co-inhibitory receptor for T cells<sup>47</sup>. The convergence of evidence from gene expression and  
462 chromatin accessibility suggests that genetically determined *PVRIG* expression changes underlie  
463 RA risks, potentially by modulating T cell activation (**Extended Data Fig. 5b**). As an example of  
464 GWAS locus that colocalizes with only eQTLs, *RPS26* gene has a strong eQTL that is shared in  
465 all immune cell-types in DICE colocalizing with an RA locus (12:56470625; PP4: 0.93-0.95).  
466 Interestingly, the TSS peak of *RPS26* (chr12:56435365-56435865) is accessible in all cell types,  
467 but their caQTL did not colocalize with the RA GWAS locus, suggesting possible alternative eQTL  
468 mechanisms<sup>48</sup> (**Extended Data Fig. 5c**).

469  
470 GWAS loci that colocalize with caQTL but not eQTLs (caQTL-only) are more difficult to interpret.  
471 Yet, this category was the largest colocalization category of all, and greatly increased the number  
472 of explained GWAS loci from an average of 32.9%, when considering eQTLs alone, to 57.3%  
473 when adding caQTLs (**Fig. 5a**). These findings mirror results from recent studies<sup>5,6,49</sup>, which also  
474 found that many GWAS loci are associated with changes in chromatin-level phenotypes but not  
475 mRNA levels. This led us to wonder how GWAS loci that colocalizes with a caQTL but not an  
476 eQTL might function.

477  
478 To nominate causal genes at caQTL-only GWAS loci, we focused on cPeaks overlapping with  
479 TSS. In total, 220 (15.3%) GWAS-caQTL loci mapped to promoter regions, which allowed us to

480 nominate a putative causal gene. For example, we identified a peak ~100 bp upstream of the  
481 gene *ZFP36L1*. In CD4 T cells, the same caQTL colocalized with multiple GWAS including CD,  
482 ulcerative colitis (UC), RA and MS, suggesting it may affect a common mechanism underlying  
483 multiple autoimmune diseases. *ZFP36L1* is an RNA-binding protein that is differentially expressed  
484 in osteoarthritis and coeliac disease and has been shown to regulate T cell and B cell  
485 development<sup>50-52</sup>, although its exact mechanism in other autoimmune diseases remains unknown  
486 (**Supplementary Fig. 5d**). In another case, the promoter peak (chr22:37256806-37257306) for  
487 gene *NCF4* has a caQTL colocalizing with an RA GWAS locus in NK and CD8 T cells  
488 (**Supplementary Fig. 5e**). *NCF4* has been identified as a risk gene for RA by genetic associations  
489 previously; it might be linked to NADPH metabolism in RA and can also regulate NK/CD8 T cell  
490 frequencies<sup>53-55</sup>. However, previous eQTL studies did not nominate this gene for RA. These cases  
491 suggest that caQTL-GWAS colocalization can, in a limited number of cases, find putative disease  
492 genes. The 220 caQTL-only colocalizations gene promoters can be found in **Supplementary**  
493 **Table 12**.

494  
495 We also asked whether cell-type specific caQTLs or dynamic caQTLs across our defined topic  
496 trajectories could explain GWAS hits. On the one hand, we found that cell-type specific caQTLs  
497 are less likely to colocalize with GWAS hits compared to shared caQTLs or all caQTLs combined.  
498 On the other hand, dynamic caQTLs were more likely to colocalize with GWAS hits than other  
499 types of caQTLs, suggesting that caQTLs with dynamic effects tend to capture trait-relevant  
500 regulatory elements (**Fig. 5b**). Using the RA GWAS as an example, we found that 24 out of 69  
501 (34.8%) GWAS loci that colocalized with a caQTL have an underlying dynamic effect on chromatin  
502 accessibility, significantly more than expected by chance (OR=2.27, p-value=1.70e-05; Fisher's  
503 exact test). These results suggest that identifying caQTLs with dynamic effects may help interpret  
504 GWAS hits. Still, dynamic caQTLs contributed to very few colocalization with GWAS in absolute  
505 numbers because the vast majority of caQTLs do not exhibit dynamic effects, at least at current  
506 sample sizes (**Fig. 5c**).

### 507 508 **Limited convergence of caQTL and eQTL signals prevents functional interpretation of** 509 **most trait-associated loci**

510  
511 We have shown that most GWAS-caQTL colocalizations do not have a corresponding  
512 colocalization with an eQTL, and that only a small number of these colocalizations are likely to  
513 help with causal gene identification because they impact a gene promoter. We next turned to the  
514 GWAS loci that colocalized with both an eQTL and a caQTL and show improved identification of  
515 causal disease genes only when both caQTL and eQTL colocalize in the same cellular context.

516  
517 We first examined the cell-type contexts that were implicated by GWAS loci with both a caQTL  
518 and an eQTL colocalization (caQTL+eQTL loci). To allow comparisons between our eQTL and  
519 caQTL contexts, we assigned the 15 DICE cell-types to one of the five common immune cell-type  
520 contexts defined in our scATAC-seq data (**Extended Data Fig. 5a**). We found that a substantial  
521 fraction (375/1,532, 25.4%) of the caQTL+eQTL loci colocalized with the caQTL and eQTL in  
522 distinct cell-types (**Fig. 5d**). We also observed that GWAS loci that colocalize with a caQTL or  
523 eQTL in multiple contexts tend to colocalize with multiple distinct peaks and eGenes, respectively

524 **(Extended Data Fig. 6a,b)**. These observations suggest pleiotropic genetic effects for a  
525 substantial fraction of GWAS loci, which hinders our ability to identify which gene or cell context  
526 is likely causal for the trait of interest.

527  
528 We found that 24.4% of caQTL-GWAS colocalizations also colocalize with an eQTL in the same  
529 contexts. We hypothesized that eQTLs at these GWAS loci more likely pinpoint the causal  
530 disease gene as both caQTL and eQTL converge in the same context. To test this, we leveraged  
531 the SNP-to-gene pairs database (S2G)<sup>56</sup> as a ground truth for causal SNP-to-gene effects. We  
532 tested the enrichment of SNP-to-gene links inferred from our QTL data among S2G pairs, using  
533 the closest gene as baseline (**Fig. 5e**). We found that caQTL+eQTL S2G pairs in overlapping  
534 contexts are significantly enriched for S2G links ( $\log_2\text{OR} = 0.70$ ,  $p\text{-value} = 7.64\text{e-}8$ ; Fisher's exact  
535 test), whereas caQTL+eQTL pairs in different contexts were depleted with S2G links ( $\log_2\text{OR}=-$   
536  $0.35$ ,  $p\text{-value}=7.95\text{e-}3$ ) (**Fig. 5f**). Furthermore, we found no enrichment in S2G pairs when using  
537 the eGene to link SNPs to genes at GWAS loci colocalized only with an eQTL ( $\log_2\text{OR}=-0.31$ ,  $p\text{-}$   
538  $\text{value}=1.89\text{e-}2$ ), or when using the nearest TSS to the cPeak at caQTL-only GWAS loci ( $\log_2\text{OR}=-$   
539  $0.02$ ,  $p\text{-value}=0.89$ ) (**Fig. 5f**). Thus, GWAS colocalization with a caQTL and an eQTL in the same  
540 cell context is helpful for determining causal genes. Conversely and notably, colocalization with a  
541 caQTL or eQTL alone or in non-overlapping contexts does not help identify causal genes, at least  
542 compared to simply using the nearest gene.

543  
544 Using GWAS loci that colocalized with a caQTL and eQTL in the same contexts, we were able to  
545 narrow down the possible causal genes to no more than two genes and two contexts for hundreds  
546 of loci. Many of the candidate genes and cellular contexts have known roles in disease etiology.  
547 For instance, one inflammatory bowel disease (IBD) GWAS locus 9:139269198 colocalized with  
548 eQTLs of *CARD9* and *SDCCAG3* in monocytes, and that of *DNLZ* in TH1-17 cells. The same IBD  
549 locus is also colocalized with two caQTLs in monocytes and NK cells. Thus, we nominated  
550 *CARD9* and monocytes as the likely causal gene and context for this GWAS locus. In support of  
551 this, *CARD9* (but not *SDCAG3*) is one of the well-established causal genes in IBD<sup>57-59</sup>, and it is  
552 the only gene linked to the GWAS SNP 9:139269198 in the S2G database (S2G score=1, the  
553 largest possible score in S2G). Furthermore, the colocalized peak is predicted to be connected to  
554 *CARD9* TSS in monocytes in the ABC model, whereas no enhancer-TSS links were found in T  
555 cells. *CARD9* is highly expressed in classical and non-classical monocytes, whereas *DNLZ* is  
556 lowly expressed in TH1-17 cells. The identified peak (chr9:139271584-139272084, ~13.3Kb  
557 upstream of *CARD9* TSS) is also monocyte-specific and harbors fine-mapped IBD GWAS SNPs  
558 (**Fig. 5g**). This example highlights the need to consider multiple lines of molecular information to  
559 obtain a set of high-confidence targets, and supports our interpretation that caQTL or eQTL  
560 colocalization can be misleading.

561  
562 In conclusion, GWAS colocalization with both a caQTL and an eQTL gives us the best chance at  
563 identifying the causal genes and contexts underlying trait association. However, most caQTL-  
564 GWAS colocalization identified in our study did not colocalize with an eQTL in any context. Thus,  
565 although genetic effects on chromatin accessibility across multiple immune cell-types and  
566 contexts drastically increase GWAS loci colocalization rates to a molecular QTL, our work suggest

567 that they should be interpreted with caution as their effects on gene expression levels are yet  
568 unidentified.

569

## 570 Discussion

571

572 In this study, we constructed a harmonized map of single-cell chromatin accessibility  
573 accompanied with high-quality genotype information. Unlike single cell eQTLs studies which have  
574 become streamlined with the development of new approaches and best practice<sup>60,61</sup>, there exists  
575 few studies and approaches for caQTLs mapping in single cells. We show that by applying both  
576 allelic-imbalance modeling in RASQUAL and the sc-PME model, we can identify a set of high-  
577 confidence caQTLs whose summary statistics can be used for state-of-the-art downstream  
578 analyses. In total, we were able to identify 37,390 caQTLs from our integrated scATAC-seq  
579 dataset, which quadrupled the number of caQTLs from that reported in a recent, smaller study<sup>36</sup>.  
580 We also utilized the continuous nature of cell loadings in topic analysis to map dynamic caQTLs.  
581 We find that topics are more straightforward to interpret compared to principal components<sup>36</sup>.

582

583 Remarkably, we found that adding caQTLs increases colocalized GWAS loci by an average of  
584 ~50% compared to eQTLs alone, suggesting that mapping caQTLs in single cells may be a  
585 promising paradigm for studying and biologically interpreting disease associated variants. As such,  
586 our work corroborates similar findings reported from recent bulk caQTL studies<sup>42</sup>.

587

588 Still, there has been no straightforward explanation as to why, in any given cell-type context, many  
589 GWAS loci only have effects on chromatin, but not on gene expression level. We found that the  
590 sharing of caQTLs across immune cell-types is widespread, but their impact on gene expression  
591 levels is much more restricted owing to cell-type specific gene expression and/or cell-type specific  
592 enhancer-promoter interaction. Thus, we interpret novel caQTL-GWAS colocalization results with  
593 caution. We posit that many – if not most – caQTL-GWAS colocalizations do not reflect meaningful  
594 regulatory effects in a causal cell-type context. Thus, finding the gene and cell-type context that  
595 causally mediates genetic effects on complex traits may be difficult even when a caQTL-GWAS  
596 colocalization has been found. Our findings that caQTLs are widely shared across immune cell-  
597 types and states indicate that most of these caQTLs may impact gene expression levels in  
598 immune contexts for which eQTLs are unavailable. Thus, increasing the cell context coverage  
599 maps of eQTLs will help in finding more cell-type contexts in which caQTL, eQTL, and GWAS  
600 signals all align, but this will also lead to uncertainty in which context is most relevant for the trait.

601

602 Our findings are consistent with the existence of poised or primed enhancers, which are  
603 accessible in many cell-types and states, but affect expression level of nearby genes only when  
604 context specific transcription factors are activated (e.g. upon immune stimuli or during  
605 differentiation)<sup>45</sup>. However, the concept of primed enhancer does not generalize well across very  
606 different immune cell-types such as B cells and monocytes, in which many open chromatin  
607 regions are shared, but their impact on gene regulation may differ. Of note, a recent multi-modal  
608 study shows that open chromatin states are shared among various RA-associated cell-states,  
609 whereas the gene expression profiles are distinct<sup>62</sup>. More work is required to figure out how the  
610 same *cis*-regulatory region can impact different genes in different cell-types. But what is clear is

611 that these effects appear prevalent and complicates fine-mapping of causal genes at disease  
612 GWAS loci.

613  
614 In conclusion, we demonstrate the utility of chromatin accessibility data in the functional study of  
615 regulatory elements, but we argue that caQTL data — especially those without clear effects on  
616 gene expression levels — often do not have any downstream regulatory impact. Thus, we  
617 highlight the need for integrating additional and orthogonal information such as eQTL data,  
618 enhancer-promoter links (e.g. ABC score), and other functional data to elucidate mechanisms of  
619 GWAS loci. Our findings suggest that population-scale studies using multi-omic single cell assays  
620 in disease-relevant contexts will be instrumental in improving our ability to uncover the molecular  
621 mechanisms through which individual non-coding variants impact disease risk. More  
622 challengingly, our results suggest that we have yet to identify many of the causal cell-types for  
623 GWAS traits. Mapping eQTLs in relevant cell populations from disease patients<sup>1,63,64</sup> or from  
624 organoids<sup>65,66</sup> subject to diverse treatments may be a fruitful approach in this direction.

## 625 **Methods**

### 626 **Clinical sample collection.**

627 We collected PBMCs from 20 COVID-19 patients hospitalized in Montréal, Canada with COVID-  
628 19 between April 2020 and December 2021 who initially presented with symptomatic, primary  
629 infection. All acute phase samples were collected from unvaccinated patients within 20 days of  
630 symptom onset. None received plasma transfer therapy. We also prospectively sample a subset  
631 of the same patients during convalescent phase COVID-19 (n = 11), and healthy controls (n = 5).  
632 The respective institutional IRBs approved multicentric protocol: MP-02-2020-8929. Written,  
633 informed consent was obtained from all participants or, when incapacitated, their legal guardian  
634 before enrollment and sample collection.

635

### 636 **scATAC-seq sample processing.**

637 **Initial preparation.** Cryopreserved samples were thawed and cultured in RPMI 1640 without  
638 glutamine (Fisher) supplemented with 10% fetal bovine serum (Corning), 1% L-glutamine (Fisher),  
639 and 0.01% gentamicin from 10 mg/mL stock (Fisher) overnight. After incubation, samples were  
640 washed with PBS, passed through a 40µm filter, and manually counted with trypan blue staining  
641 by brightfield hemocytometer.

642

643 **Nuclei isolation.** As in the demonstrated protocol CG000169, Rev. E, from 10X genomics, we  
644 lysed each batch of 1 million cells with a IGEPAL 630 / digitonin based lysis buffer for 3 minutes  
645 on ice. Nuclei were then washed once and resuspended in 7.5uL of 10X Genomics Nuclei Buffer.  
646 Finally, 2.5uL of nuclei were counted by trypan blue staining on a hemocytometer.

647

### 648 **Single-cell ATAC library preparation and sequencing.**

649 **Single-cell ATAC capture.** We followed the 10X Genomics Chromium Next GEM Single Cell  
650 ATAC Reagent kit with version #1.1. Nuclei were transposed by isothermal incubation at 37°C  
651 and Post Gel Bead-in-Emulsion (GEMs) were generated by the 10X Controller and subjected to  
652 PCR as described in the 10X User Guide, and post-incubation products were stored at -20°C until

653 downstream processing. Each sample was captured individually (i.e. without pooling) aiming for  
654 5,000 nuclei from each sample to be captured.

655  
656 **Single-cell ATAC library preparation.** Post GEM incubation cleanup and sequencing library  
657 preparation were performed as described in the Single Cell ATAC Reagent Kits v1.1 User Guide  
658 (10X Genomics). Briefly, we cleaned up post-incubation GEMs first with DynaBeads MyOne  
659 SILANE beads (ThermoFisher Scientific) and then with SPRIselect reagent (Beckman Coulter).  
660 Libraries were constructed by performing sample index PCR (98 °C for 45 s, 9 or 10 cycles of  
661 98°C for 20 s, 67°C for 30 s, 72°C for 20 s, and 72°C 1 min) followed by SPRIselect size selection.  
662

663 **Next-generation sequencing.** Prior to sequencing, all multiplexed single-cell libraries were  
664 quantified using the KAPA Library Quantification Kit for Illumina Platforms (Roche) and pooled in  
665 an equimolar ratio. Libraries were sequenced by 100 base pairs (read1: 50, i7: 8, i5: 16, read2:  
666 50) on an Illumina NovaSeq 6000.

667  
668 **Preprocessing of in-house and public scATAC-seq data.**

669 We processed data in all three studies from FASTQ files using the following pipeline. Reads were  
670 processed using cellranger-atac v2.1.0 with an in-house GRCh37 reference genome generated  
671 using scripts from 10X Genomic documentations (<https://support.10xgenomics.com/single-cell-atac/software/release-notes/references#GRCh38-2020-A-2.0.0>). We removed reads that were  
672 unmapped, did not have primary alignment, failed platform/vendor quality checks, and had  
673 duplicated or supplementary alignment; we only kept reads that were paired and mapped in  
674 proper pairs ('samtools view -f 3 -F 3844'). We then removed allelic-biased reads using the  
675 WASP<sup>67</sup> workflow implemented in Hornet. We converted the resulting BAM file from each library  
676 into a fragment file using sinto v0.7.5 and loaded into an ArchR project separately. We then  
677 analyzed each library separately to identify high-quality barcodes and remove doublets. As a first  
678 pass, we excluded cell barcodes with fewer than 1,000 and more than 50,000 unique fragments,  
679 with a TSS enrichment score lower than six for all libraries and excluded those with high ratios of  
680 reads mapping to nucleosomes, mitochondrial genome or ENCODE blacklist regions in a library-  
681 specific manner (**Extended Data Fig. 1b**). We also used AMULET<sup>68</sup> on BAM files to flag and  
682 remove potential doublets (AMULET q-value < 0.1).  
683

684  
685 **Preprocessing and cell-type annotation of public scRNA-seq data.**

686 We re-analyzed previously published PBMC scRNA-seq data from COVID-19 patients<sup>67</sup>. Count  
687 matrix was downloaded from Human Cell Atlas webpage and converted to a Seurat object. As a  
688 first pass, we ran Azimuth with PBMC reference to annotate all the cells. We compared Azimuth  
689 L1 annotation (B, CD4 T, CD8 T, dendritic cells (DC), monocytes, natural killer cells (NK), other  
690 T cells) with original cell type labels provided by the author, and only kept cells with consistent  
691 labels.  
692

693 **Basic analysis of scATAC-seq data**  
694 Through the processing steps above, we identified a list of barcodes that represent high-quality  
695 single cells with individual ID for each library. We then loaded the fragment files containing these  
696 barcodes from all libraries to one ArchR project for integrated analysis. Dimension reduction on



697 this full dataset was performed on the binary tile matrix, selecting the top 30,000 variable tiles and  
698 outputting 50 reduced dimensions with 'addIterativeLSI' function in ArchR. We then feed this LSI  
699 projection to the 'reducedMNN' function in R package 'batchelor' to remove batch effects across  
700 libraries<sup>69</sup>. We implemented a wrapper function to add MNN-adjusted dimensions to the ArchR  
701 project object, enabling downstream analysis within ArchR framework. Cell clusters were  
702 identified with a resolution of 0.8. For visualization, the reducedMNN-adjusted LSI was used to  
703 derive a UMAP embedding with 'minDist=0.8' and 'spread=1'.

704  
705 To calculate gene activity scores (GA scores) from scATAC-seq profiles, we generated an in-  
706 house gene reference set from the GENCODE v19 annotation. Basically, we started from all the  
707 gene symbols in the full GENCODE annotation and removed those whose 'gene\_type' map to  
708 one of the following: snRNA, misc\_RNA, snoRNA, rRNA, miRNA, pseudogene,  
709 polymorphic\_pseudogene, IG\_V\_pseudogene, TR\_V\_pseudogene, IG\_C\_pseudogene,  
710 TR\_J\_pseudogene, IG\_J\_pseudogene, processed\_transcript, sense\_intronic,  
711 3prime\_overlapping\_ncrna and sense\_overlapping, keeping 32,885 genes on chr1-22 and chrX.  
712 We then extracted the transcript start sites (TSS) and exons for these genes and constructed a  
713 gene annotation object that was added into our ArchR project. Our custom annotation includes  
714 important marker genes that are missed in the default hg19 annotation used by ArchR, such as  
715 gene *LINC02446* (also known as *RP11-291B21.2*, **Fig. 1f**), a long non-coding RNA that marks  
716 activated CD8 T cells<sup>9</sup>. Using this custom gene annotation, we then calculated the GA score using  
717 'addGeneScoreMatrix' with default parameters in ArchR.

718  
719 To better annotate cell-types in our scATAC-seq data, we integrated it with our Azimuth-annotated  
720 scRNA-seq data and transferred the annotation labels to scATAC-seq cells. We first performed  
721 unconstrained integration using the 'addGeneIntegrationMatrix' function in ArchR. We then  
722 examined the confusion matrix between cell clusters and annotated cell-types. Several clusters  
723 contained mixed cell-types from the reference dataset. Upon further speculation, we found these  
724 clusters tend to have higher rates of mitochondrial DNA and lie between well-defined cell-types  
725 in the UMAP, suggesting these cells are of lower quality or are potential unremoved doublets. We  
726 excluded these cells from the dataset and performed constrained integration by restricting cells  
727 within four groups: T/NK cells, monocytes/DC, B cells and other (platelet and HSPC). After this  
728 round of constrained integration, we found several T/NK cell subtypes in L2 have very low cell  
729 numbers in scATAC-seq data, we therefore only kept labels with sufficient cell numbers (CD14  
730 Mono, CD16 Mono, NK, NK\_CD56bright, NK Proliferating, pDC, cDC2, Platelet, B naïve, B  
731 intermediate, B memory, Plasmablast, gdT, MAIT, CD4 Naïve, CD4 TCM, Treg, CD8 Naïve, CD8  
732 TEM, CD8 TCM, HSPC) and performed another iteration of constrained integration. Finally, we  
733 re-calculated the LSI, MNN-adjusted dimensions and the UMAP embedding and Leiden  
734 clustering on the remaining cells.

735  
736 To identify candidate peaks, we first produced pseudo-bulk group coverages in each Leiden  
737 cluster and used the three studies as sample labels in  
738 'addGroupCoverages(sampleLabels="Sample")'. We then called reproducible peak set by setting  
739 'reproducibility=2' in 'addReproduciblePeakSet'. In this way, we were able to identify peaks that  
740 are called in at least two of the three studies in our data.

741  
742 **Genotype imputation from aggregated scATAC-seq data.**  
743 Read coverage across the genome was visualized using 'plotCoverage' from deepTools<sup>70</sup>,  
744 excluding blacklist regions from ENCODE. Genotype likelihood calculation and imputation were  
745 performed following GLIMPSE documentation<sup>69</sup>. Briefly, we first inferred genotype likelihoods  
746 across all SNPs in the 1000 Genome Project from filtered BAM files from scATAC data with  
747 'bcftools mpileup'. In this step, we only included sites with sequencing depth below 15 ("bcftools  
748 view -i 'FORMAT/DP<=15'") to avoid regions with unreasonably high read coverage. Next, we  
749 merged genotype likelihood from all individuals from the three studies and performed GLIMPSE  
750 genotype imputation jointly. Imputed genotypes were phased with eagle v2.4.1<sup>71</sup>.

751  
752 To confirm GLIMPSE-imputed genotypes from scATAC-seq reads are of high quality and are not  
753 biased by strong allele-specific signals in accessible chromatin regions, we compared Minimac4  
754 imputation from microarray with GLIMPSE results in the 13 individuals with microarray data from  
755 Benaglio et al<sup>7</sup>. We first imputed the microarray genotype data from the original study using the  
756 pipeline documented in Michigan Imputation Server<sup>72</sup>  
757 (<https://imputationserver.readthedocs.io/en/latest/pipeline>). We used the same reference panel  
758 as in our GLIMPSE pipeline. We then calculated mean imputation quality score (INFO score) for  
759 SNPs stratified by reference MAF bins. We also calculated correlation between genotype dosages  
760 for SNPs imputed using GLIMPSE and Minimac4 and derived mean correlation across the 13  
761 individuals in each reference MAF bin using 'vcf-stats'.

762  
763 **Topic modeling on scATAC count data.**  
764 **Fitting the topic model.** Topic modeling was performed using the R package 'fastTopics'<sup>71</sup>. We  
765 retrieved the cell-by-peak count matrix from the ArchR object. In practice, we considered two  
766 aspects in fitting Poisson NMF to our count data. First, fitting the topic model on the full data is  
767 computationally expensive. Second, the NMF problem is non-convex, meaning that each model  
768 fit returns slightly different results, making it difficult to compare the output using different  
769 parameters even on the same data. To speed up the model fitting process, we randomly down  
770 sampled 10,000 cells. For peaks that have zero counts in these 10,000 sampled cells, instead of  
771 removing them from the matrix, we further sampled cells where they have non-zero counts. This  
772 ensures that we can project the fitted model to the full count matrix. In total, 10,711 cells were  
773 used for the initial model fitting. To make sure we can easily compare multiple model fits on the  
774 same data, we first performed NMF using a small number of total topics (k), and then fit NMF with  
775 more topics conditioning on the previous model fit. We started by fitting the topic model with k=6  
776 using the 'fit\_topic\_model' function, using 100 main iterations and 200 refining iterations  
777 ('numiter.main=100, numiter.refine=200'). This returned a multinomial topic model fitting, which  
778 was then projected to the full count data using the 'predict' function implemented in 'fastTopics'.  
779 To fit a model with eight topics (k=8), we propagated the loading matrix and the factor matrix from  
780 k=6 with two more columns of uniformly distributed values (1/k for loading matrix and 1/[number  
781 of peaks] for score matrix). We then applied the fitting steps adapted from the 'fit\_topic\_model'  
782 function. Briefly, the expanded loading matrix and factor matrix were passed into  
783 'init\_poisson\_nmf' together with the down sampled count matrix to initialize a new Poisson model.  
784 Then, the model was fitted with EM algorithm for 100 iterations (main fitting) and updated with

785 SCD algorithm for 200 iterations in two consecutive runs of the 'fit\_poisson\_nmf' function. The  
786 fitted Poisson model was converted to a multinomial NMF model with 'poisson2multinom' function.  
787 The output of this final step is a cell-by-eight-topic loading matrix. We iterated this process with  
788 10, 12, 14, 16, 18 and 20 topics. This framework allowed us to keep the order of topics constant,  
789 making it possible to compare across model fits, while updating them when more topics are added.  
790 To visualize topic modeling results in a Structure plot, we performed PCA on the loading matrix  
791 (after centering and scaling) and used the rotated data matrix for K-means clustering (K=30). To  
792 avoid over-plotting, we randomly selected 2.5% of cells from each cluster, resulting in a subset of  
793 ~5,500 cells for visualization.

794

795 **Calculation of gene-level scores from peak-level scores.** To define a molecular program  
796 underlying each topic, we relied on the factor matrix. We selected the top 10% of peaks with the  
797 highest score in each topic. To calculate gene-level scores from peak-level scores, we applied  
798 ArchR's exponential-weighting strategy to calculate gene activity scores. Briefly, scores of peaks  
799 within the gene body are directly summed up, and scores of peaks up to 5 Kb upstream of the  
800 gene TSS are weighted by distance-based power-law. We then calculated the Z score of each  
801 gene across all the topics.

802

803 **Stratified-LDSC analysis on top peaks in each topic.** For s-LDSC analysis, we selected top  
804 10% peaks with the highest scores from each topic. Each peak was extended to 1,500 bp around  
805 its center. We used GWAS summary statistics for 50 phenotypes (11 immune-related diseases  
806 and 36 blood cell-type traits, and height as a negative control) (**Supplementary Table 13**). GWAS  
807 summary statistics were munged by 'munge\_sumstats.py'. LD score calculation and s-LDSC  
808 analysis were carried out according to LDSC documentation conditioning on default baseline  
809 annotations.

810

811 **Association between topic k17 loadings and COVID-19 status.** To test whether k17 loadings  
812 are associated with COVID-19 status, we first calculated average donor-level k17 loadings for  
813 each sample. We only included cells from healthy controls or active COVID-19 at the time of  
814 sample collection and with k17 loading larger than 0.01, as cells below this cutoff largely represent  
815 estimation noise. We then fitted two mixed-effects logistic regression models:

816 (1)  $\text{logit}(\text{COVID} - 19) \sim \text{loading}_{k17} + M\text{Ratio} + n\text{Frag} + (1|\text{donor})$

817 (2)  $\text{logit}(\text{COVID} - 19) \sim M\text{Ratio} + n\text{Frag} + (1|\text{donor})$

818

819 Formula (1) is the full model and (2) is the null model. We then performed a likelihood ratio test  
820 (LRT) with 'anova' function in R to test whether k17 loadings significantly predicts donor COVID-  
821 19 status.

822

823 **Trajectory analysis in topic model.** We defined the cell trajectory directly from topic loadings  
824 with slight modifications to accommodate the analysis workflow of the ArchR package. As a proof-  
825 of-concept, we first scrutinized the B cell trajectory. Since k2 represents naive B cells, its loadings  
826 are the highest in naive B cells and decreases in memory B cells and plasmablast. To construct  
827 a trajectory that represents B cell maturation, we used the reverse order of k2 loadings, such that  
828 the trajectory value increases as naive B cells transit into memory B cells. The trajectory was

829 restricted to L1-annotated B cells, and we set the value of all other cell-types to 'NA', so that  
830 ArchR does not use these cells in the analysis. The trajectory values were then scaled to the  
831 range of 0-100 for downstream analysis. To study the change in the proportion of memory B cells  
832 or plasmablasts along the trajectory, the trajectory was divided into percentiles, and we calculated  
833 the proportion of non-naive B cells in each percentile according to L1 annotation. When building  
834 a trajectory for k9, we removed cells whose k9 loadings are below 0.1, as these likely represent  
835 background noise rather than biologically meaningful variations.

836  
837 After deriving the trajectory values from cell loadings, we added the trajectories to the ArchR  
838 project as a metadata column. To visualize the changes of gene activity scores along the  
839 trajectory, we used the 'getTrajectory' function, followed by 'plotTrajectoryHeatmap' functions with  
840 options 'varCutOff=0.8, returnMatrix=TRUE'. The heatmap was visualized using  
841 ComplexHeatmap<sup>73</sup>.

842  
843 To assess the relevance of k17 trajectory to COVID-19, we first asked in a cluster-based analysis,  
844 how many differentially active genes can be found between healthy and COVID-19 cells. To do  
845 so, we compared all COVID-19 cells with all healthy cells in k17 trajectory regardless of k17  
846 loadings using the 'getMarkerFeatures' function. We then grouped cells into quintiles according  
847 to their k17 loadings, where higher quintiles were enriched for more COVID-19 cells. We next  
848 tested for differential gene activity between all cells in the first quintiles and COVID-19 cells in the  
849 higher quintiles (second and above). Note in this test we used healthy and COVID-19 cells in the  
850 first quintile as control, following the idea that COVID-19 cells in the first quintile are epigenetically  
851 similar to healthy cells.

### 852 **Chromatin accessibility QTL mapping.**

853 **RASQUAL caQTL mapping.** Chromatin accessibility QTL (caQTL) were first mapped using  
854 RASQUAL on three grouping levels, whole blood-like (WB-like), L1 and L2 annotations. We  
855 generated pseudobulk counts by summing single-cell counts across cell barcodes within each  
856 group. For the WB-like group, we included all peaks and all individuals. For caQTL mapping in L1  
857 and L2 cell-types, we only included cell-types with at least 50 cells in at least 10 individuals. From  
858 the pseudobulk count table, we calculated library sizes and phenotype PCs (after scaling and  
859 centering; using 'prcomp' function in R). To get allelic-specific read counts, we extracted reads  
860 from each group using 'filterbarcodes' command from sinto v0.7.5 and counted allelic-specific  
861 reads using 'createASVCF.sh' from RASQUAL. We only kept bi-allelic SNPs with at least four  
862 minor allele counts across tested individuals. We included library size as offsets and five genotype  
863 PCs, the number of cells, and the GC content for each peak as covariates. RASQUAL was run in  
864 nominal mode and permutation mode. We extracted the lead SNP for each tested peak and used  
865 nominal and permuted  $\log_{10}(\text{q-value})$  from RASQUAL to calculate empirical p-values with  
866 'empPvals' function from the 'qvalue' R package, and then derived q-values from the empirical p-  
867 values. We used q-value below 0.1 as the cutoff for significant caQTLs.

868  
869 **Enrichment of RASQUAL caQTLs in bulk LCL caQTLs.** To test the enrichment of RASQUAL  
870 caQTLs from WB in bulk caQTLs from LCL, we obtained summary statistics from a previous  
871 study<sup>28</sup>. We extracted lead SNP for each peak in the LCL dataset and ranked them by their  
872

873 significance. We then tested the enrichment of RASQUAL lead SNPs in the top 1%, 5%, and 10%  
874 of the most significant LCL caQTL lead SNPs using Fisher's exact test.

875

876 **Enrichment of RASQUAL caQTLs in DICE bulk eQTLs.** To test the enrichment of RASQUAL  
877 caQTLs from common immune cell types in bulk eQTLs from DICE, we first extracted the genomic  
878 locations of lead eQTL SNPs and extended it by 500 bp on each side and converted it to bed  
879 format. These eQTL regions form the genomic annotation in which caQTL enrichment is tested.  
880 We then converted RASQUAL lead caQTL SNP positions to bed format, and tested their  
881 enrichment in eQTL regions using QTLtools 'fenrich' command<sup>74</sup>, while feeding our peak set into  
882 the '--tss' argument to adjust for the fact that RASQUAL caQTLs are enriched in the cPeaks  
883 themselves. The odd ratios from 'fenrich' were visualized after being normalized to the maximum  
884 odd ratio in each caQTL cell type.

885

886 **Single-cell Poisson mixed-effect model (sc-PME) caQTL mapping.** Single-cell caQTL  
887 mapping with the sc-PME model was first performed in three studies separately. For continuous  
888 covariates, we included top five genotype PCs, top five LSI dimensions, TSS enrichment scores,  
889 fraction of mitochondrial reads, log<sub>10</sub> of number of unique fragments, all of which are scaled and  
890 fitted as fixed effects. We also included libraries and donors as random effects. The Poisson  
891 mixed effect model was fitted using the 'glmer' function ('family=poisson') in the lme4 R package.  
892 We set the additional options as 'nAGQ=0, control=glmerControl(optimizer="bobyqa",  
893 calc.derivs=F)' to save computational time for model fitting. We performed meta-analysis using  
894 effect sizes and standard errors from all SNPs in the three datasets and ran Metasoft without  
895 genomic control. For downstream analysis, we used effect sizes and standard errors from the  
896 random effects model and p-values from the Han and Eskin's Random Effects model (RE2)<sup>34</sup>. To  
897 call significant caQTL in the meta-analyzed sc-PME results, we first applied Bonferroni correction  
898 for all SNPs in a given peak, extracted the lead SNP for each peak, and then calculated q-values  
899 from the Bonferroni-adjusted p-values across all lead SNPs. We used a q-value below 0.1 as a  
900 cutoff for significant lead caQTL.

901

902 **Dynamic caQTL mapping with sc-PME.** To identify dynamic effects of lead caQTL SNPs along  
903 cell trajectories defined by topic modeling, we tested for interaction between genotype dosages  
904 and topic loadings. To avoid confounding dynamic caQTL with cell-type specific caQTL, we (1)  
905 mapped dynamic caQTLs separately in each common cell-type and (2) only included topics that  
906 are present in each cell-type as follows: B (k1, k11), CD4 T (k6, k7, k17), CD8 T (k3, k6, k7, k14,  
907 k17, k18, k19), NK (k3, k17), monocyte (k10, k12, k15), DC (k4, k10, k12, k15), other T cell (k3,  
908 k6, k8, k14, k17, k18, k19). For each SNP, we fitted a model with genotype-by-loading interaction  
909 term and a reduced model without the interaction term. We then use R function 'anova' to perform  
910 a likelihood-ratio test (LRT) comparing the two models, and used p-values from LRT to call  
911 significant dynamic caQTLs. Because we only tested the top caQTL SNP for every cPeak, we  
912 calculated q-values from LRT p-values in each topic separately, and then multiplexed the q-value  
913 by the number of topics in which a given SNP was tested for; this is equivalent to a Bonferroni  
914 adjustment on the number of topics tested for each SNP, thus caQTL SNPs from cells with more  
915 topics (e.g. CD8 T cells) were subjected to more stringent significant level cutoff. We reported  
916 adjusted q-value below 0.01 as significant dynamic caQTLs.

917

## 918 **Colocalization of caQTLs with bulk eQTLs and GWAS.**

919 To perform colocalization between caQTLs and eQTLs, we used the eQTL summary statistics  
920 from the DICE study we re-processed and published before<sup>1</sup>. We tested for colocalization  
921 between a caQTL and an eQTL when there are more than 150 overlapping SNPs and their  
922 corresponding lead SNPs are among the overlapping SNPs.

923

924 To perform colocalization between our caQTL and in-sample COVID-19 eQTLs, we used the list  
925 of significant eGenes defined as mashr<sup>34</sup> local false sign rate (lfsr) below 0.1 in the accompanying  
926 manuscript (Randolph et al.). We tested for colocalization between a caQTL and an eQTL when  
927 there are more than 150 overlapping SNPs and their corresponding lead SNPs are among the  
928 overlapping SNPs.

929

930 To perform colocalization between caQTL and GWAS, we used GWAS summary statistics of 11  
931 immune-related diseases and 36 blood cell-type GWAS that we accessed previously<sup>1</sup>. Briefly, we  
932 defined a GWAS locus as a 1 Mb window centered around a SNP with a p-value below 1e-7,  
933 starting from the SNP with the smallest p-value, removing all SNP lies within 1 Mb, and iteratively  
934 identified all GWAS loci until no SNPs with p-value below 1e-7 remained. Like eQTL, we tested  
935 for colocalization between a caQTL and a GWAS locus when their corresponding lead SNPs are  
936 among the overlapping SNPs and there are more than 150 overlapping SNPs. All colocalization  
937 analyses were performed with the 'coloc.abf' function from R package 'coloc' v5.2.1<sup>30</sup>.

## 938 **Acknowledgements**

939 We thank N. Gonzales for her careful reading of our manuscript and their insightful  
940 comments. This work was completed in part with resources provided by the University of  
941 Chicago Research Computing Center. This work was supported by National Institute of Health  
942 grants R35GM153249 (Y.I.L.), R01GM130738 (Z.M., Y.I.L.), R01GM134376 (L.B.B.) and  
943 R35GM152227 (L.B.B.). This work was also supported by Canadian Institutes of Health  
944 Research grants VR2-173203 and 178344 to D.E.K. We also acknowledge the support from the  
945 UChicago DDRCC, Center for Interdisciplinary Study of Inflammatory Intestinal Disorders(C-IID)  
946 (NIDDK P30 DK042086). H.E.R. was supported by a Ruth L. Kirschstein National Research  
947 Service Award (NHLBI F31-HL156419). The Biobanque Québécoise de la COVID-19 (BQC19)  
948 is supported by the FRQS Génome Québec and the Public Health Agency of Canada. L.B.B.  
949 and Y.I.L. are CZ Biohub Investigators.

## 950 **Author contributions**

951

952 Y.I.L. and L.B.B. jointly supervised research. Z.M., Y.I.L., and L.B.B. conceived and designed the  
953 experiments. H.E.R., E.K., A.D., V.L., C.B, D.E.K performed the experiments. Z.M. performed  
954 statistical analyses and analyzed the data. H.E.R. and R.A.-G. also performed data analysis.  
955 Z.M. and Y.I.L. wrote the paper with critical contributions from L.B.B. and X.L. and input from all  
956 authors.

957

958 **Competing interests**

959 The authors declare no competing interests.

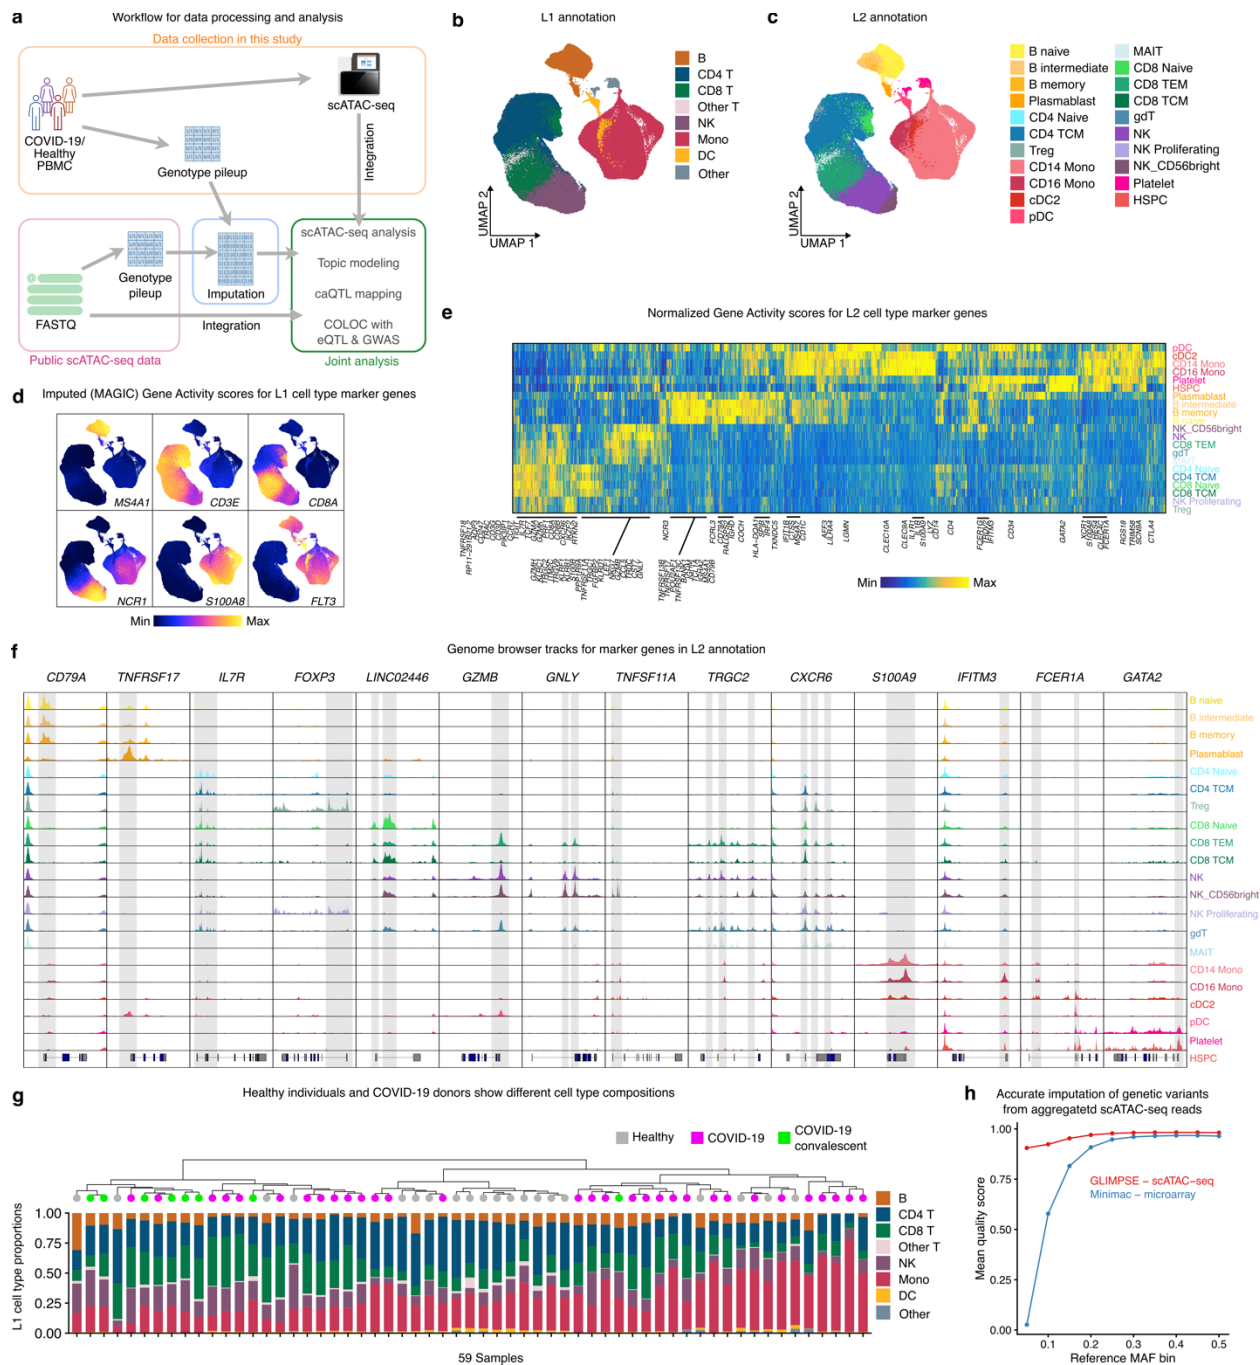

960  
 961 **Fig. 1. An integrated map of scATAC-seq of PBMC from 20 donors with active COVID-19,**  
 962 **19 COVID-19 convalescent donors and 20 healthy controls.** **a**, Schematic representation of  
 963 sample collection, data integration and analysis workflow. (Some icons are from bioicons.com).  
 964 **b**, A UMAP embedding of all cells from three integrated studies, colored by Azimuth L1 annotation  
 965 of seven common immune cell-types. **c**, The same UMAP embedding as in **b**, colored by 21  
 966 immune cell-types and subtypes in Azimuth L2 annotation. **d**, Gene activity scores of marker  
 967 genes in the seven common immune cell-types. Scores were imputed with MAGIC for  
 968 visualization purposes. **e**, Heatmap for marker genes for cell subtypes in L2 annotation. **f**, Color-  
 969 coded genome browser tracks of aggregated scATAC-seq reads in genomic loci around marker



970 genes. Shaded regions highlight cell-type-specific chromatin accessibility regions. **g**, Estimates  
971 of cell-type compositions in L1 annotation for all samples. Samples are clustered by distances in  
972 scaled cell-type compositions. **h**, Comparison of imputation quality (INFO) score from low-pass  
973 WGS using GLIMPSE, aggregated scATAC-seq reads using GLIMPSE, and DNA microarray  
974 using Minimac4 stratified by reference MAF bins.

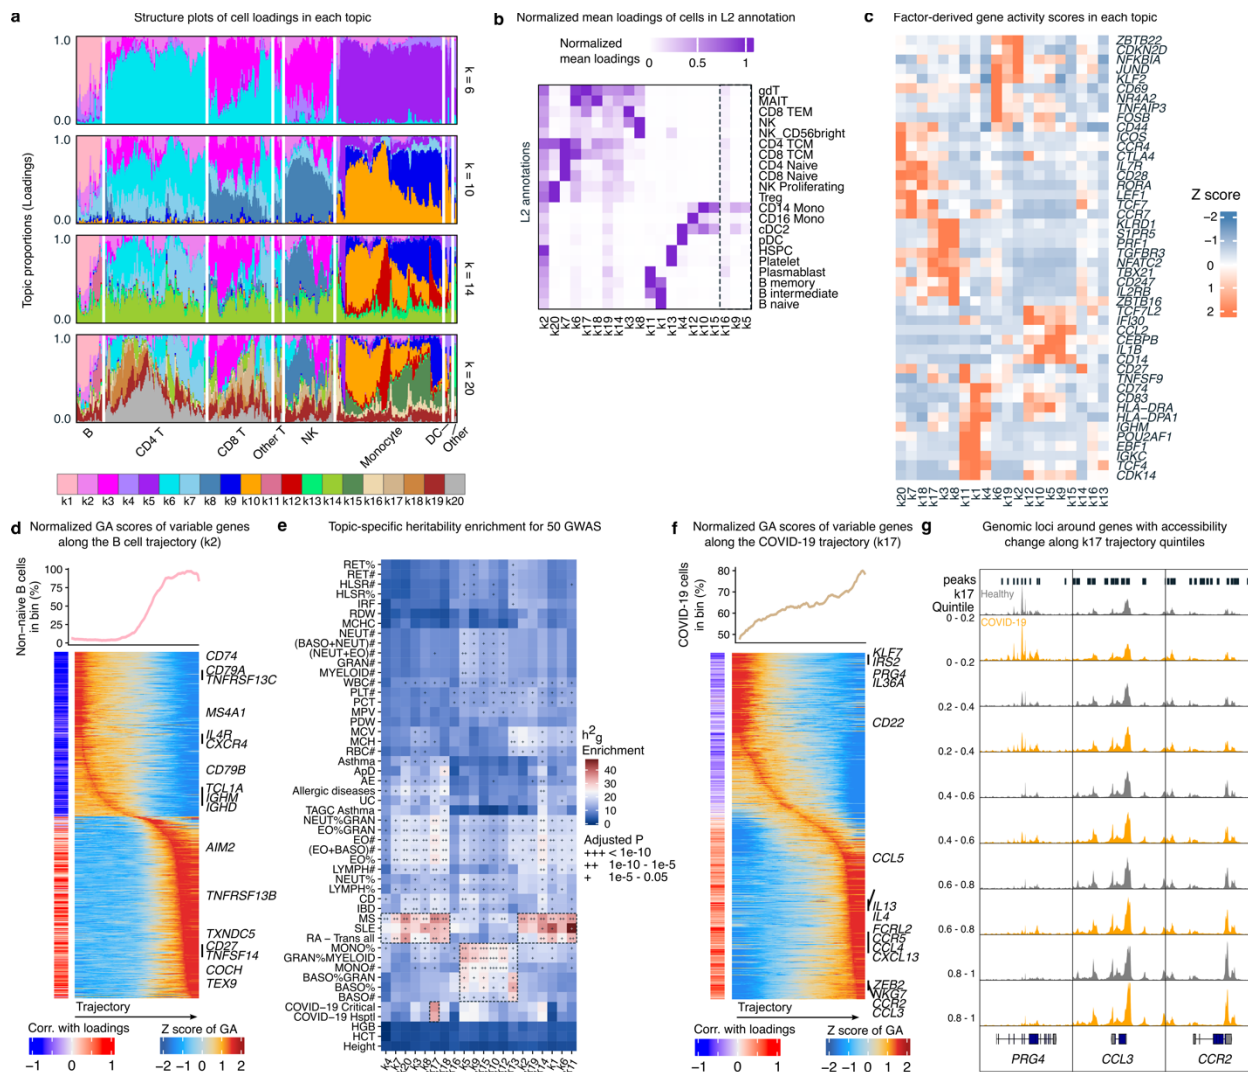

975  
 976 **Fig. 2. Topic modeling helps interpretation of inter-cellular and inter-individual variation in**  
 977 **scATAC-seq profiles.** **a**, Structure plots of topic loadings in 2,000 randomly selected cells when  
 978 fitting 6, 10, 14 and 20 topics. Cells were grouped by seven common immune cell-types to  
 979 highlight coarse-grained differences in topic loading among cell-types. **b**, Heatmap showing the  
 980 average loading for each topic in each cell-type in L2 annotation. **c**, Heatmap of Z-score  
 981 normalized gene-level scores calculated from peak-level scores in each topic. **d**, Top, smoothed  
 982 percentage of non-naive B cells in trajectory percentile. Heatmap on the left shows the Spearman  
 983 correlation between gene-activity (GA) scores and memory B cell trajectory; heatmap on the right  
 984 shows row-normalized GA score changing along the trajectory. **e**, Heritability enrichment of 50  
 985 GWAS using peaks with the highest 10% of scores in each topic. Dashed boxes highlight specific  
 986 enrichment results discussed in the main text. **f**, Similar to **d**, showing the trajectory and relevant  
 987 genes in COVID19-associated topic k17. **g**, Genome browser tracks of the genomic region around  
 988 three genes (*PRG4*, *CCL3* and *CCR2*) that progressively gained or lost accessibility along k17  
 989 trajectory. Cells are grouped by disease status and k17 quintiles.

990

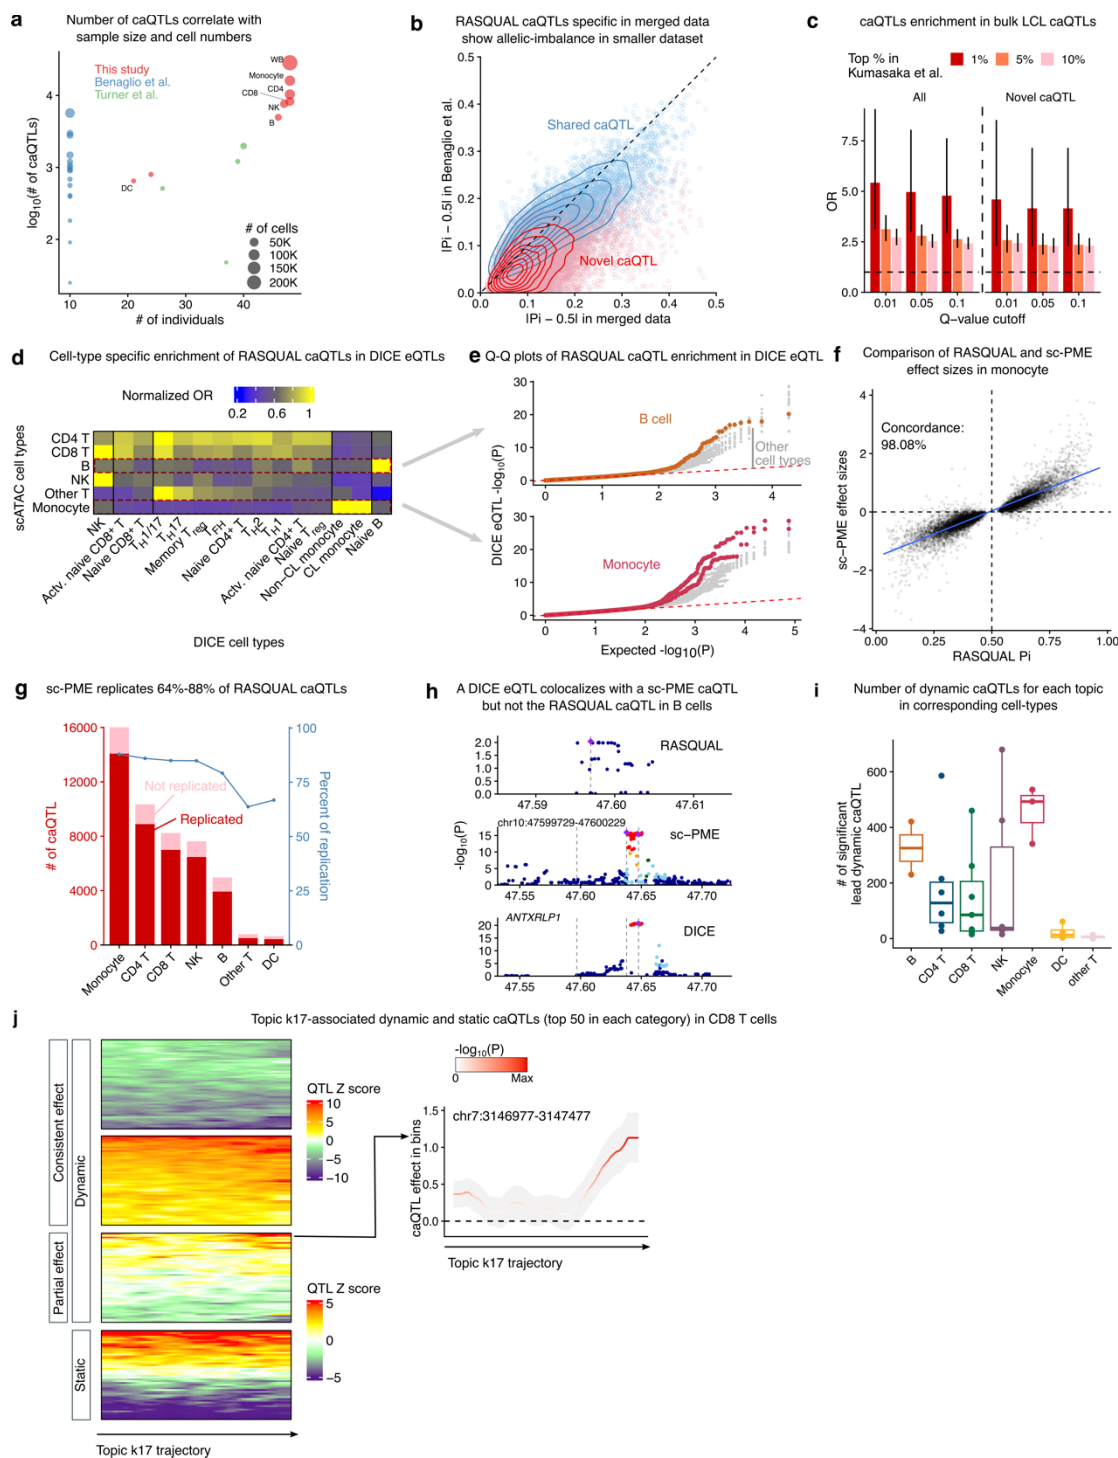

991  
 992 **Fig. 3. Mapping of caQTL with RASQUAL and sc-PME model.** a, Scatter plot comparing the  
 993 number of RASQUAL caQTL as a function of cell number and sample size in this study and two  
 994 other published scATAC-seq caQTL studies. b, RASQUAL effect sizes in our merged data and  
 995 Benaglio et al. data are highly correlated. Novel caQTLs found in merged data show allelic  
 996 imbalance in Benaglio et al., albeit with smaller effect sizes. c, RASQUAL caQTLs in whole blood  
 997 are enriched in bulk caQTLs from LCL for all significant ones (left) and only novel ones found in  
 998 our merged data (right). d, Heatmap showing cell-type-specific enrichment of caQTLs in DICE

999 eQTLs. Odd ratios are normalized by the maximum value in each row. **e**, QQ-plot of RASQUAL  
1000 caQTLs in DICE eQTLs. Top: caQTLs in B cells show elevated signals only in eQTLs from B cells  
1001 in DICE; bottom: caQTLs in monocytes show elevated signals only in eQTLs from classical and  
1002 non-classical monocytes in DICE. All other DICE cell-types were colored grey. **f**, RASQUAL and  
1003 sc-PME caQTLs have highly correlated and concordance effect sizes. Results from monocytes  
1004 are used as an example here. **g**, Replication of RASQUAL caQTL in sc-PME model in seven  
1005 common immune cell-types. Barplot shows the number of RASQUAL caQTLs that are replicated  
1006 or not in sc-PME model; line chart shows the percentage of RASQUAL caQTLs replicated. **h**, An  
1007 example of a DICE eQTL to gene *ANTXR1P1* in monocytes colocalizing with sc-PME caQTL but  
1008 is different from the RASQUAL lead SNP. Vertical dashed lines highlight the genomic  
1009 coordinations of lead SNPs in RASQUAL, sc-PME and DICE. The shaded region highlights the  
1010 mapping window of RASQUAL and its position relative to the mapping window of sc-PME. SNPs  
1011 are colored by LD to the lead SNP. **i**, Number of dynamic caQTLs in each cell-type along relevant  
1012 trajectories defined by topic loadings. **j**, left: Z scores of dynamic and non-dynamic caQTLs from  
1013 CD8 T cells in rolling windows along topic k17 trajectory. Dynamic caQTLs were further  
1014 categorized by whether they are consistently active along k17 trajectory or only in part of the  
1015 trajectory. The most significant 50 caQTLs from each category were plotted. Right: effect sizes of  
1016 one representative dynamic caQTL.  
1017

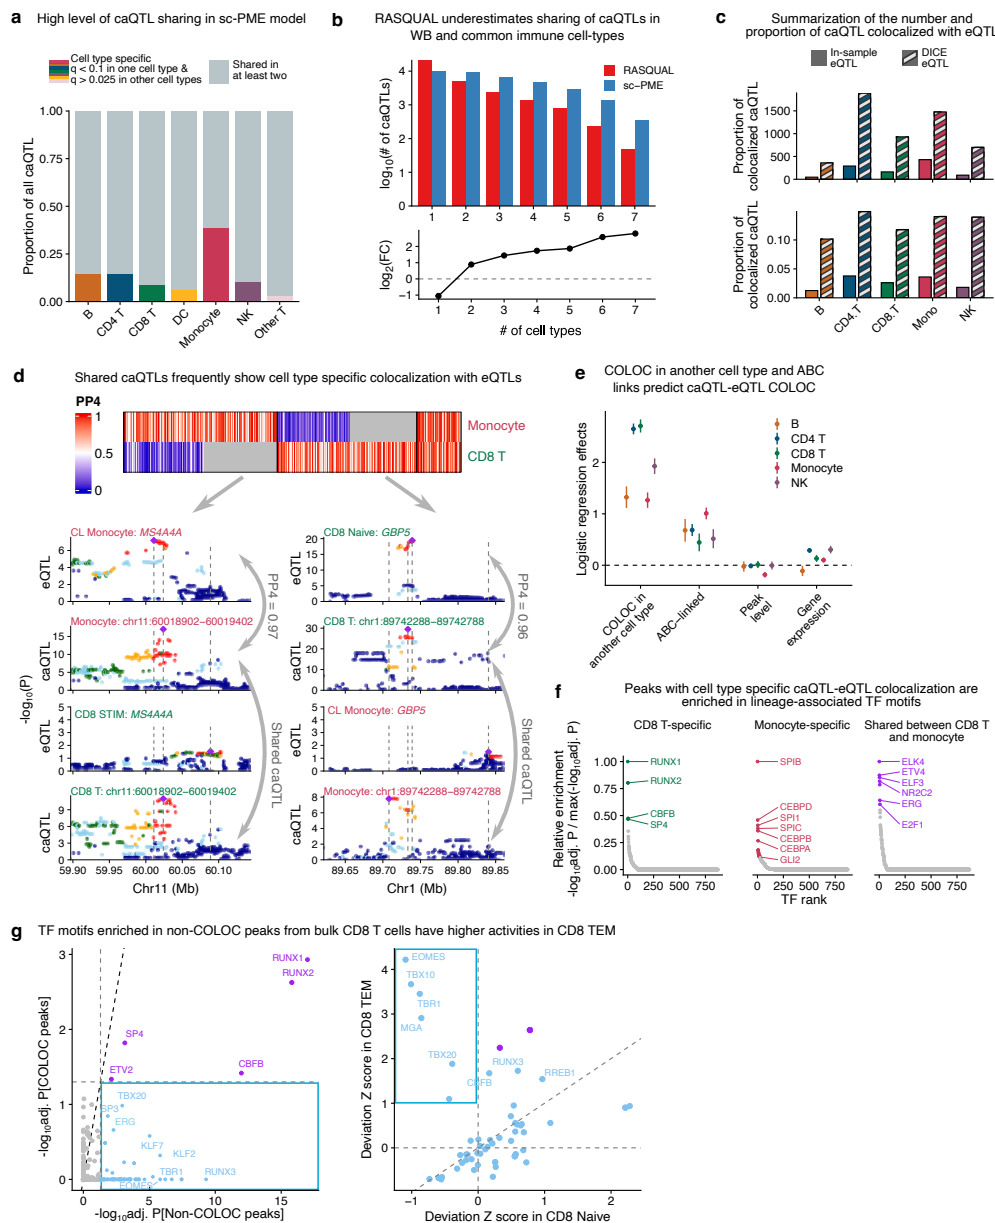

1018  
 1019 **Fig. 4. caQTL-eQTL colocalization and dynamic caQTL mapping.** **a**, Sharing of caQTLs in sc-  
 1020 PME model in five common immune cell-types. **b**, Comparison of caQTL sharing of caQTLs in  
 1021 seven immune cell-types for RASQUAL and sc-PME model. Top: bar plot of number of caQTLs  
 1022 shared in a given number of contexts. Bottom:  $\log_2$  fold-change in the number of caQTLs between  
 1023 sc-PME and RASQUAL, highlighting the increased level of sharing for sc-PME caQTLs. **c**, Barplot  
 1024 for the number (top) and proportion (bottom) of caQTLs that colocalize with eQTL from DICE and  
 1025 our in-sample accompanying eQTL data. **d**, Logistic regression coefficients and 95% confidence  
 1026 intervals for variables that predict caQTL-eQTL colocalization. Model includes all caQTL-eQTL  
 1027 pairs that colocalize in at least one cell-type. **e**, Top: heatmap for COLOC PP4 of shared caQTLs  
 1028 between CD8 T cells and monocytes. Bottom: example Manhattan plots for shared caQTL  
 1029 colocalizing with cell-type specific eQTLs in monocytes and CD8 T cells, respectively. **f**, TF motif  
 1030 enrichment in peaks whose caQTL colocalize with eQTL in CD8 T cells and monocytes  
 1031 specifically, or in both cell-types. Colored points represent TFs with adjusted enrichment p-values

1032 below 0.05. **g**, TF motifs enriched in non-COLOC peaks in CD8 T cells specifically show higher  
1033 deviation Z scores in CD8 TEM in our scATAC data.  
1034

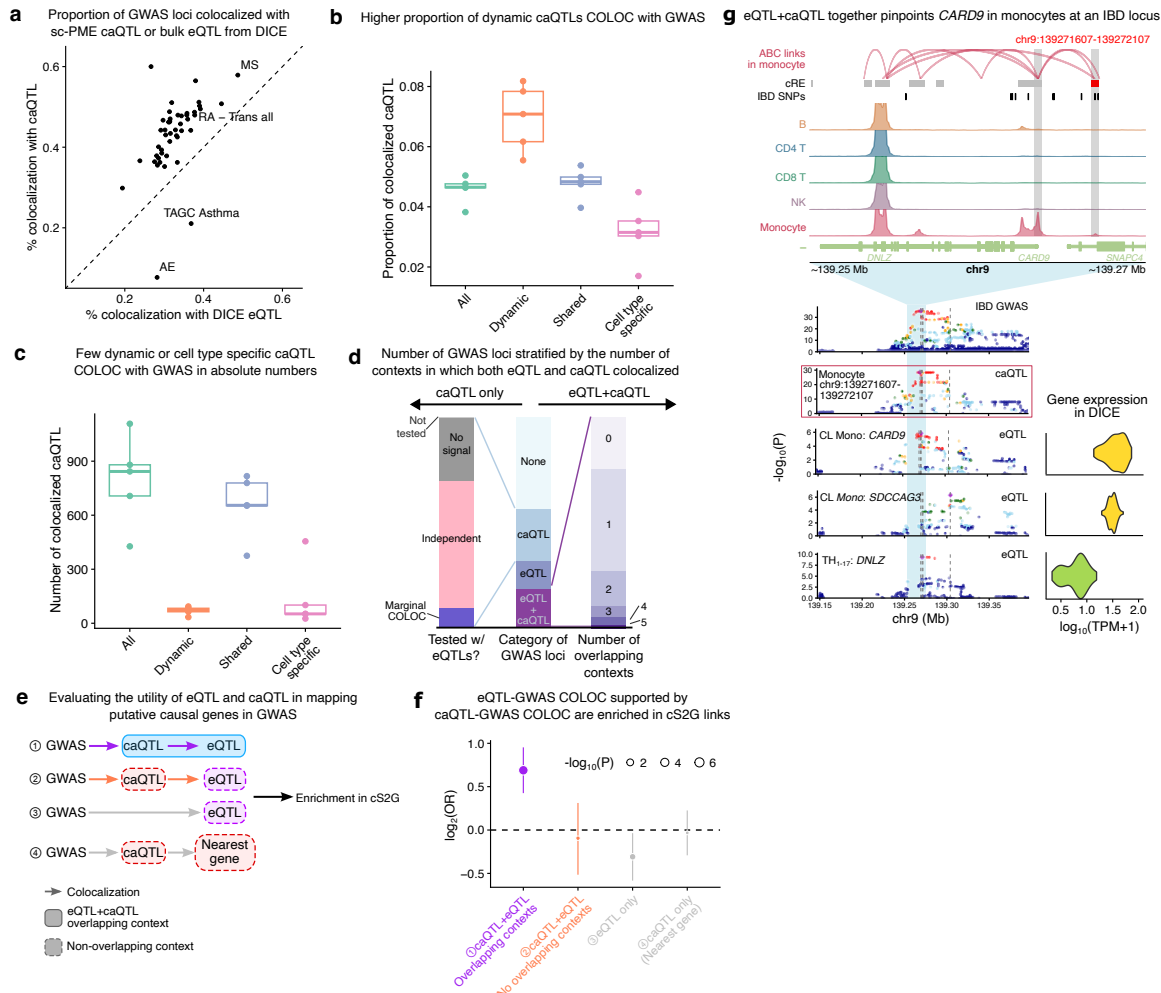

1035  
 1036 **Fig. 5. Widespread sharing of caQTLs impedes functional interpretation of disease GWAS.**  
 1037 **a**, Scatter plot for the percentage of colocalized GWAS loci with eQTL in DICE and caQTL. **b**,  
 1038 The proportion of caQTL peaks colocalizing with GWAS, categorized by all peaks, dynamic, cell-  
 1039 type specific and shared peaks in each of the five cell-types. **c**, The number of caQTL peaks  
 1040 colocalizing with GWAS, categorized by all peaks, dynamic, cell-type specific and shared peaks  
 1041 in each of the five cell-types. Schematic showing that restricting eQTL-GWAS COLOC by caQTL-  
 1042 GWAS COLOC in the same context to better nominate causal genes and contexts. **d**,  
 1043 Characterization of colocalized GWAS loci by the number of contexts in which they colocalize  
 1044 with either eQTL, caQTL or both. **f**, Forest plot showing that restricting eQTL-GWAS pairs to  
 1045 contexts also supported by caQTL-GWAS COLOC increases enrichment in causal S2G (cS2G)  
 1046 links. Error bars represent 95% confidence intervals of  $\log_2(\text{OR})$  estimates. **g**, An example  
 1047 showing that eQTL- and caQTL-GWAS COLOC together narrows down *CARD9* gene in  
 1048 monocytes as the causal gene and context for an IBD locus. Top: genome browser tracks showing  
 1049 chromatin accessibility around *CARD9* locus. Bottom: Manhattan plots for IBD GWAS, colocalized  
 1050 caQTL and eQTLs in various cell-types. Dashed lines highlight the position of lead SNPs in GWAS  
 1051 and the QTL data. Colored box highlights the nominated causal eQTL.

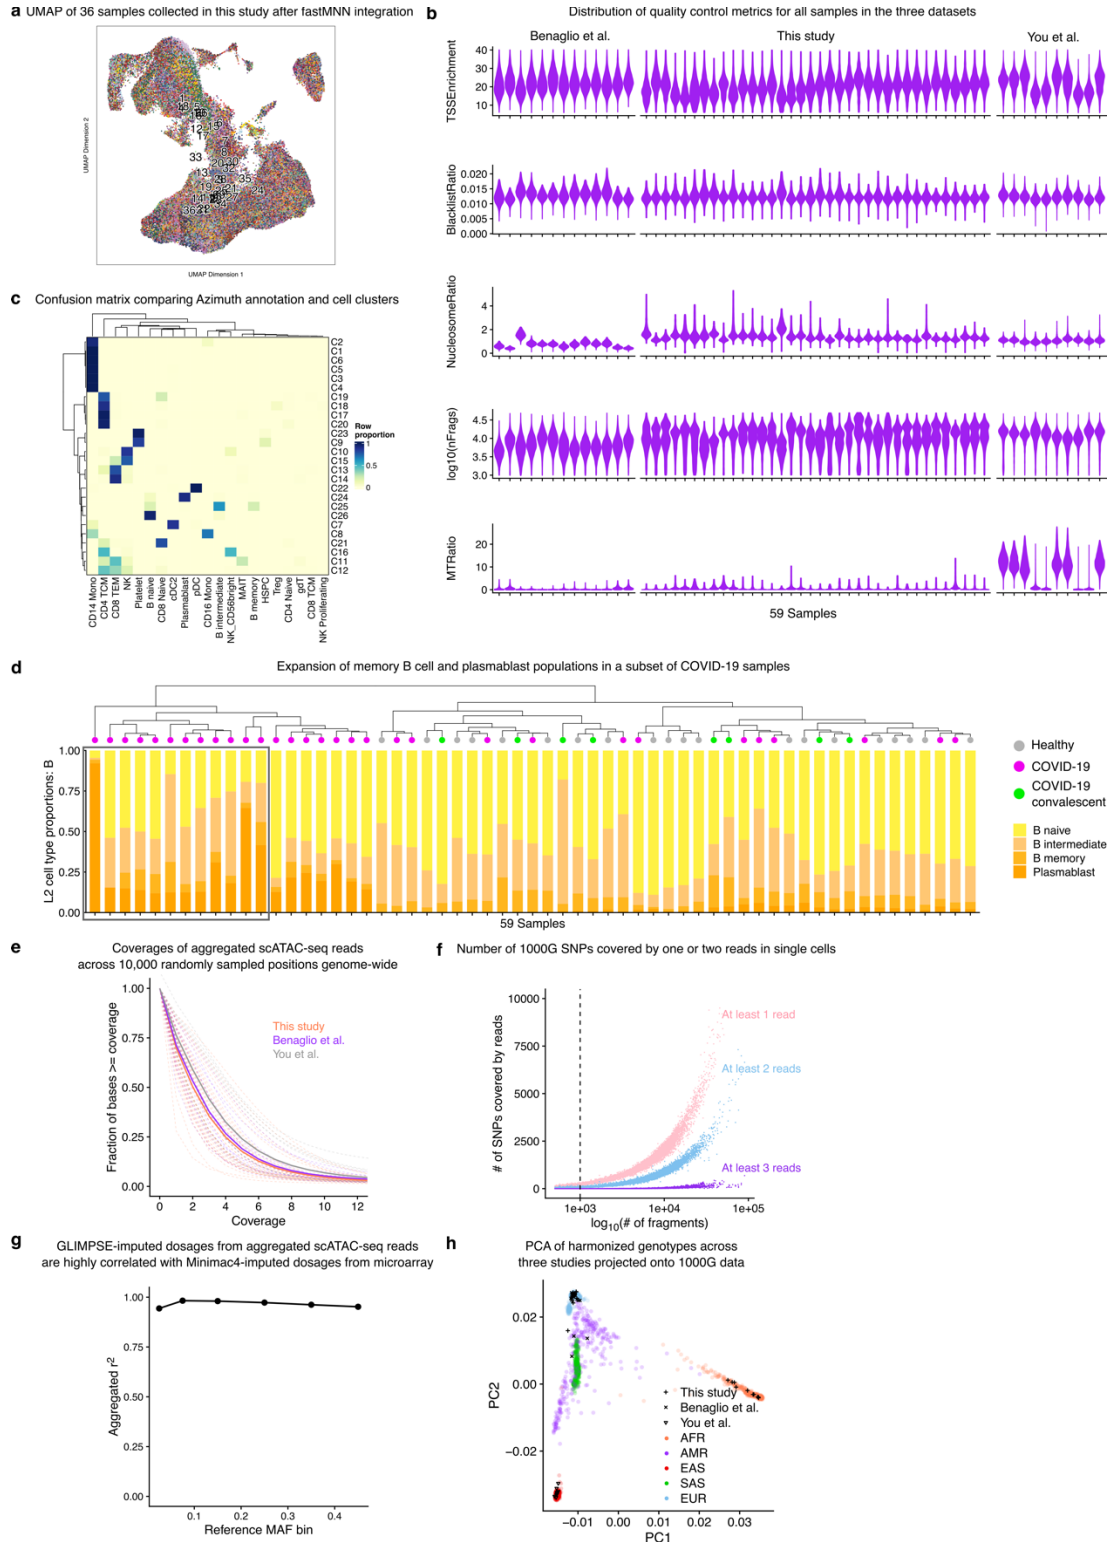

1052  
1053  
1054  
1055  
1056

**Extended Data Fig. 1. Quality control on scATAC-seq data and genotyping.** a, UMAP of integrated 36 samples collected in this study. b, Violin plots showing the distribution of common quality control metrics for all cells in the three datasets. c, Confusion matrix comparing Azimuth L2 annotation and cell clusters. Heatmap is colored by row normalized proportions, such that the



1057 cell-type compositions sum up to one on each row. **d**, Bar plots showing expansion of memory B  
1058 cells and plasmablasts (highlighted in border) in a group of COVID-19 samples. **e**, The three  
1059 scATAC-seq data sets used in this study have very similar read coverages at 10,000 randomly  
1060 sampled positions genome-wide. **f**, Number of 1000G SNPs covered by at least one, two or three  
1061 reads in each single cell as a function of the number of unique fragments. Dashed line indicates  
1062 1,000 unique fragments, the cutoff we used for filtering low-quality cells. **g**, Mean correlation  
1063 between GLIMPSE-imputed genotype dosages from aggregated scATAC-seq reads and those  
1064 imputed from microarray data using Minimac4. **h**, PCA analysis of all individuals in this study with  
1065 1000G samples.

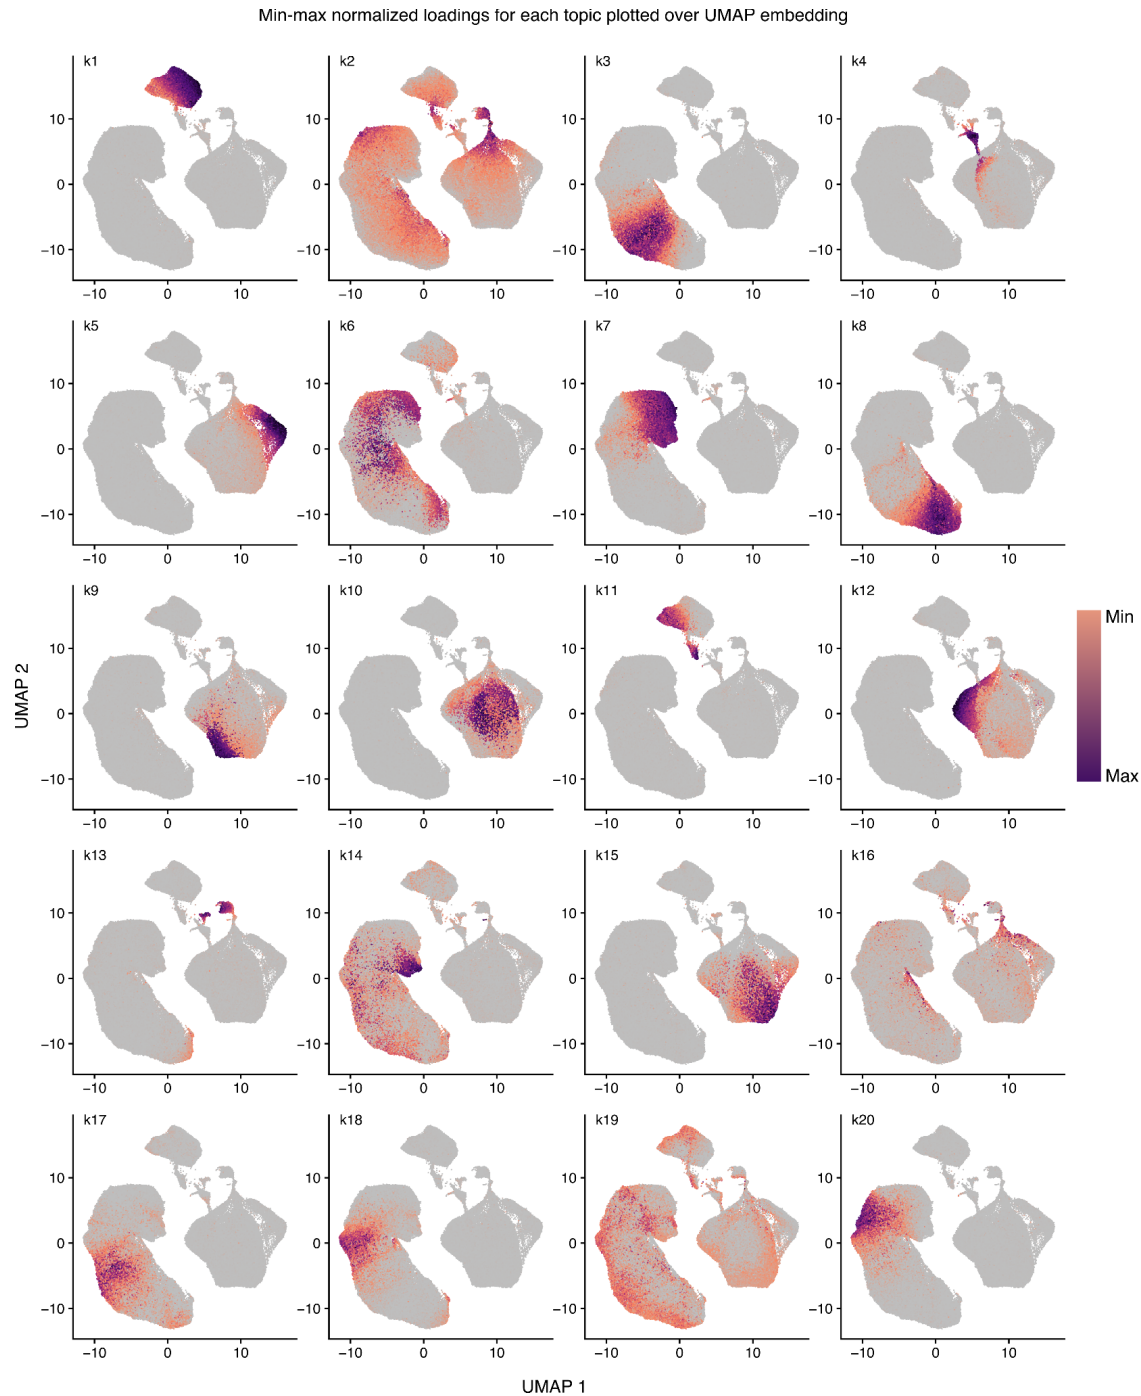

1066  
1067  
1068  
1069  
1070

**Extended Data Fig. 2. Visualization of cell loadings for the 20 topics in UMAP embedding.** UMAP plots showing the distribution and quantity of loadings for the 20 topics. Loading scores are normalized by min-max for each topic, and loading scores below 0.05 in a cell were set to 0 for visualization purposes (gray).

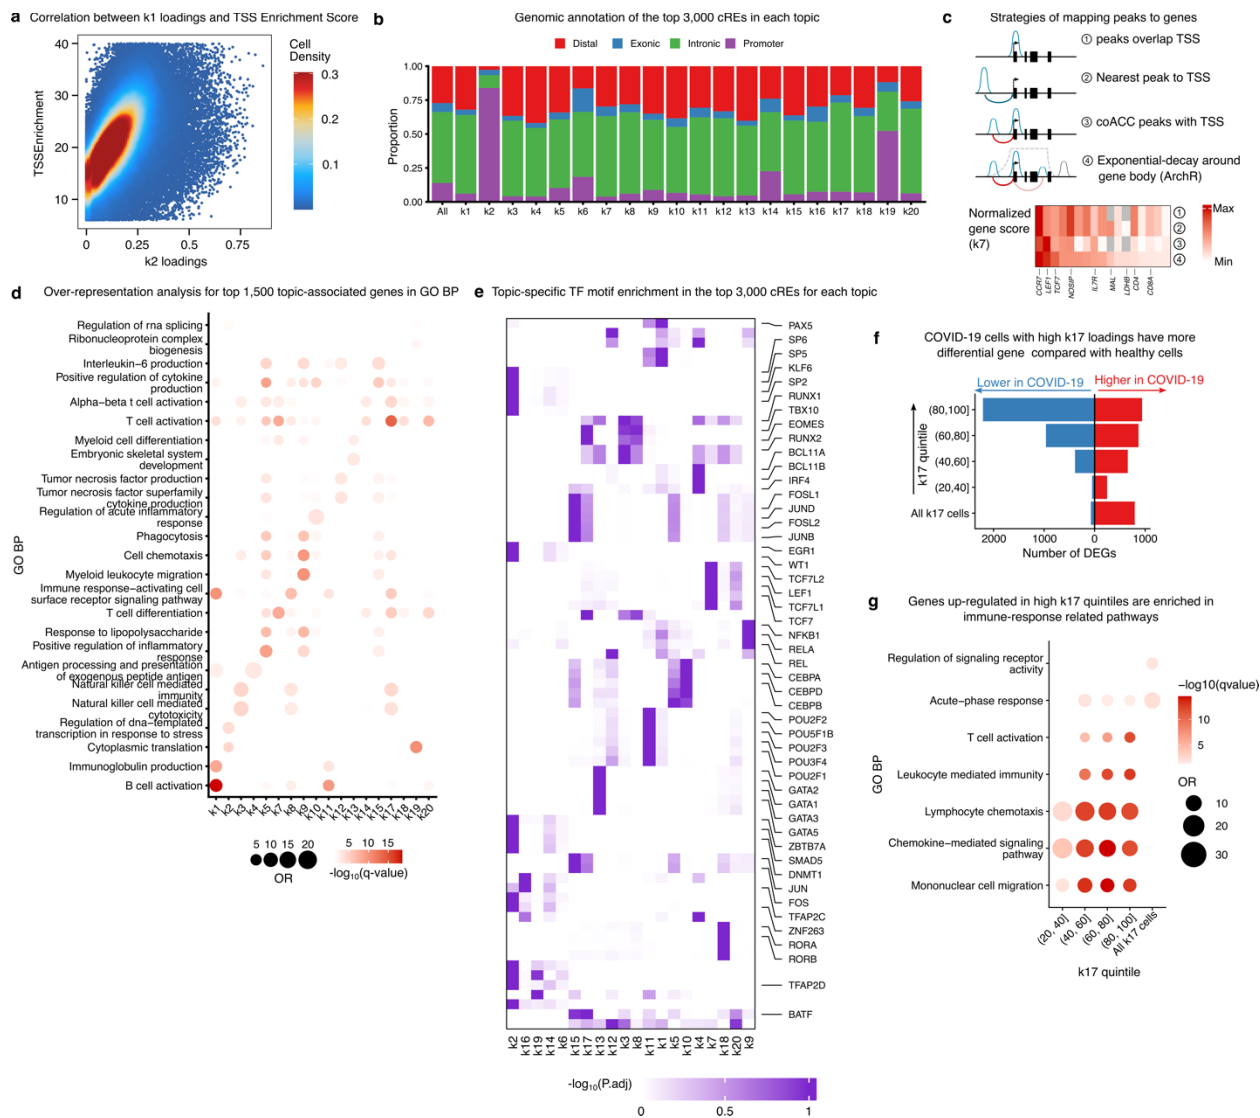

1071  
 1072 **Extended Data Fig. 3. Topic modeling analysis.** **a**, Scatter plot showing the correlation between  
 1073 k2 loadings and TSS Enrichment scores. **b**, Bar plot showing the genomic annotation of the top  
 1074 3,000 peaks in each topic, compared to all peaks, highlighting the over-representation of  
 1075 promoters in k2. **c**, Top: schematic showing the four strategies to calculate gene-level score from  
 1076 peak-level scores in topic analysis. Bottom: gene-level scores calculated from the four strategies  
 1077 for peaks in topic k7, which is a naive T cell topic. **d**, GO Biological Process pathways enriched  
 1078 in top 1,500 scored genes for each topic. **e**, Heatmap of adjusted p-values for TF motif enrichment  
 1079 in top 3,000 peaks in each topic.  $-\log_{10}(P \text{ adj.})$  values are normalized relative to maximum for each  
 1080 TF across all topics. Top five enriched TFs are shown for each topic. **f**, The number of differentially  
 1081 active genes in COVID-19 cells in the top 4 k17 quintiles compared to all cells in the first k17  
 1082 quintiles, plotted together with the number of differentially active genes when all COVID-19 cells  
 1083 in k17 were tested against all healthy cells in k17. **g**, GO Biological Process pathways enriched  
 1084 in up-regulated genes from groups in **f**. Only groups with significantly enriched GO terms are  
 1085 plotted.  
 1086

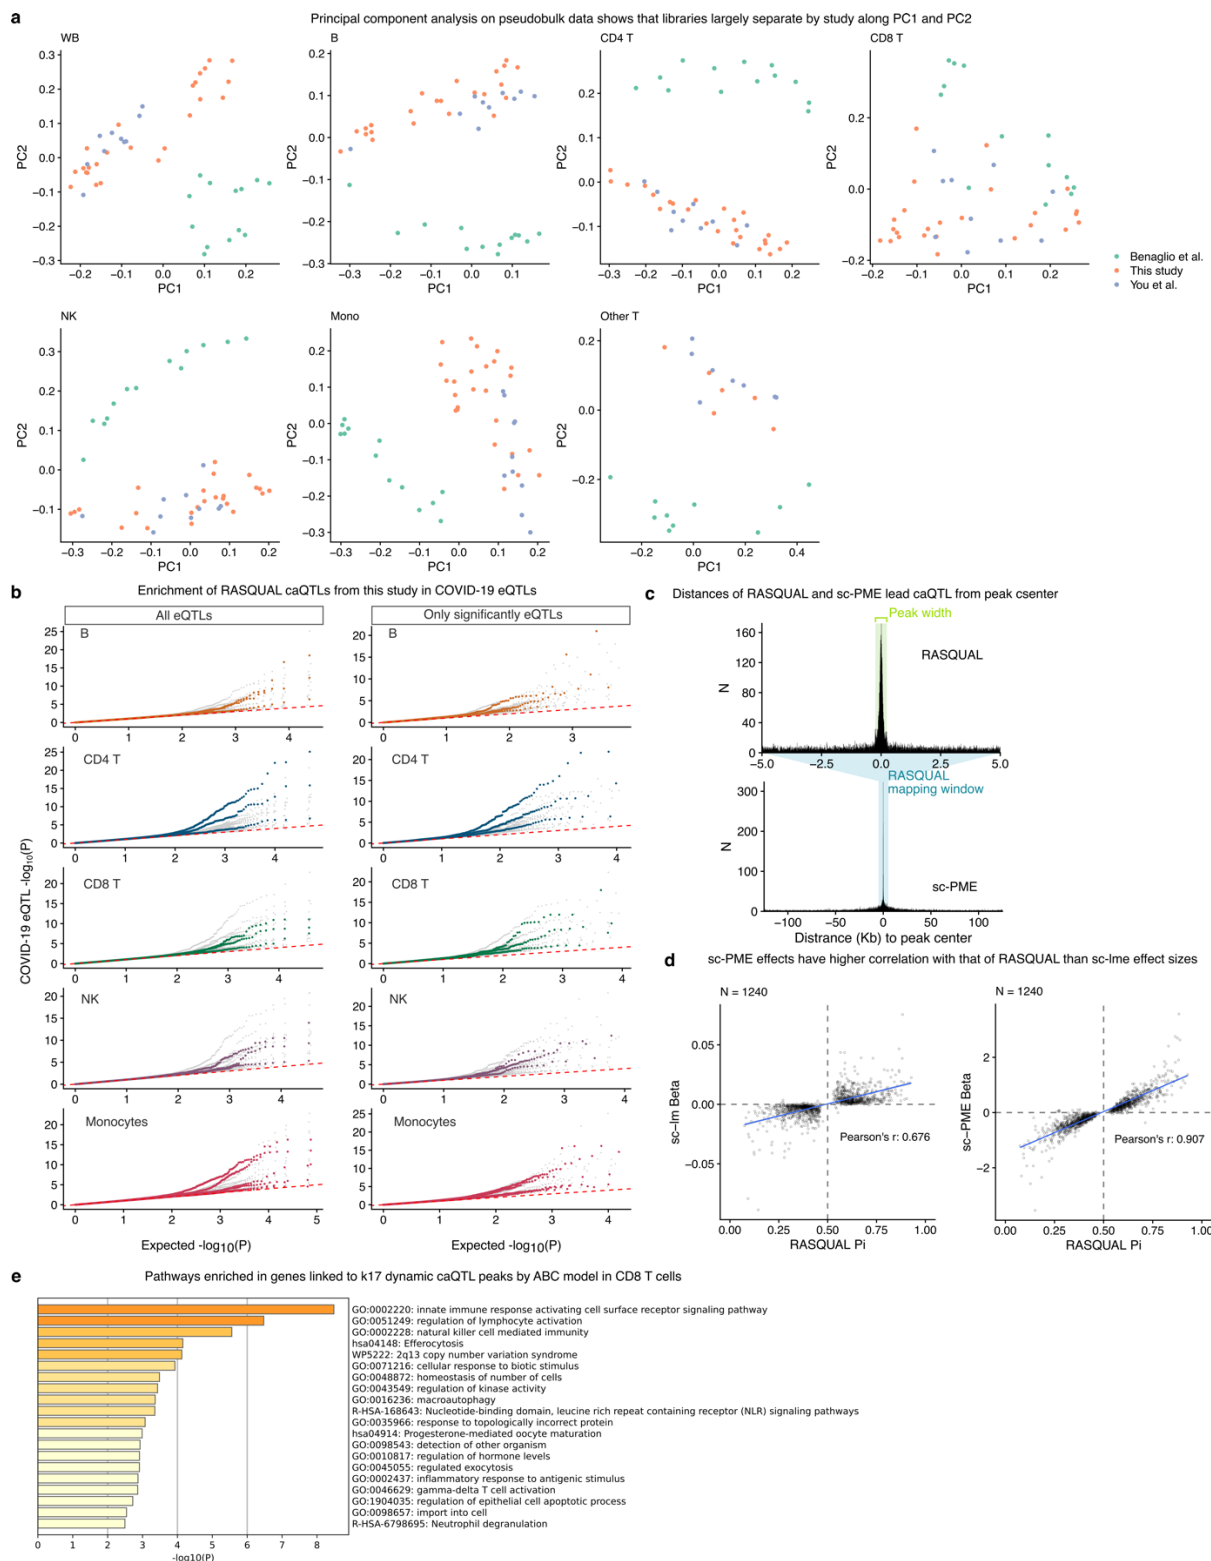

1087  
 1088 **Extended Data Fig. 4. CaQTL mapping using RASQUAL and sc-PME model in harmonized**  
 1089 **data. a**, Principal component analysis (PCA) on pseudobulk count data for WB and six cell-types  
 1090 in which caQTL mapping was conducted. Each sample is colored by study. **b**, QQ-plot showing  
 1091 the enrichment of caQTLs in our accompanying COVID-19 eQTLs for all eQTLs (left) and

1092 conditioning on only significant eQTLs (right). For each cell type in our study, we extracted and  
1093 plotted eQTLs p-values from all cell types, highlighting matched cell types in colored dots; eQTL  
1094 p-values from the remaining cell types were colored grey. When all genes are used, caQTLs tend  
1095 not to have the highest enrichment in eQTLs in corresponding cell types, except for CD4 T and  
1096 monocyte, due to lower power in the eQTL data (left). We therefore conditioned on only significant  
1097 eGenes in each cell type to mitigate the differences in power between cell types, and observed  
1098 larger enrichment of caQTL in eQTLs for matched cell types (right). **c**, Histogram showing  
1099 distances from peak centers to significant lead caQTL in monocytes from RASQUAL (top) and  
1100 sc-PME (bottom). Green shaded region highlights peak size (500 bp); blue shaded region  
1101 highlights RASQUAL mapping window (10 Kb) relative to sc-PME mapping window (250 Kb). **d**,  
1102 Scatter plots comparing RASQUAL effect sizes ( $P_i$ ) with sc-lme effect sizes (left) and sc-PME  
1103 effect sizes (right). Only significant RASQUAL caQTLs on chromosome 1 in monocytes were  
1104 plotted. **e**, Top pathways enriched in genes linked to peaks with k17-interacting dynamic caQTLs  
1105 in CD8 T cells.  
1106

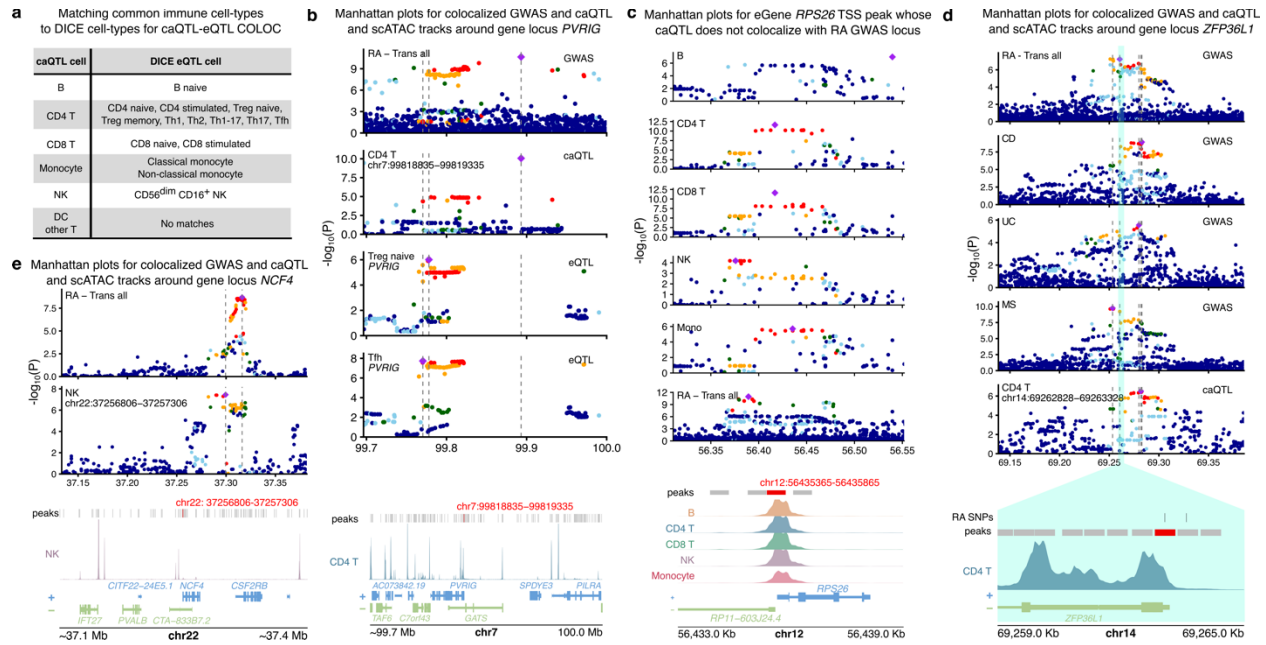

1107

1108

1109

1110

1111

1112

1113

1114

1115

1116

1117

1118

**Extended Data Fig. 5. a**, Table summarizing the mapping of 15 immune cell-types in DICE data to the seven common cell-types used in caQTL mapping. **b**, Manhattan plots for RA GWAS locus (7:99893148) and colocalized caQTLs (chr7:99818835–99819335) and eQTLs (*PVRIG*), with genome browser tracks for scATAC data in CD4 T cells. **c**, Manhattan plots for an RA GWAS locus near TSS of *RPS26*; the GWAS locus colocalized with *RPS26* eQTLs in DICE. The TSS peak is accessible and has caQTL in all five cell types, but the caQTLs do not colocalize with the RA GWAS. **d**, Manhattan plots for RA, CD, UC, MS GWAS loci and colocalized cPeak (chr14:69262828–69263328). Genome browser track shows promoter region of *ZFP36L1* near the colocalized peak and scATAC data in CD4 T cells. **e**, Manhattan plots for RA GWAS locus (22:37316259) and colocalized cPeak (chr22:37256806–37257306) in NK cells in the *NCF4* locus. Genome browser track shows scATAC data in NK cells in the same region.

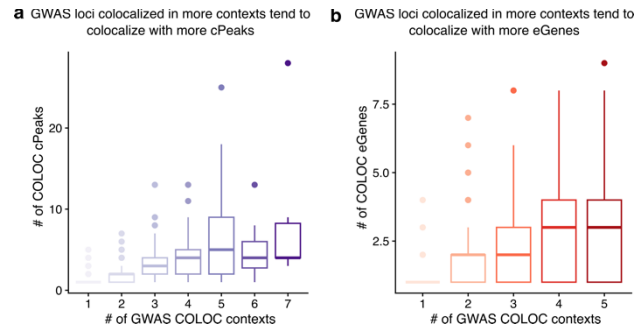

1119  
1120  
1121  
1122  
1123  
1124  
1125

**Extended Data Fig. 6. a,** Boxplot showing the number of colocalized peaks for each GWAS locus as a function of the number of contexts where colocalization is detected. **b,** Boxplot showing the number of colocalized genes in DICE for each GWAS locus as a function of the number of contexts where colocalization is detected. The 15 DICE cell-types and subtypes were mapped to 5 common immune cell-types.

## 1126 References

- 1127 1. Mu, Z. *et al.* The impact of cell type and context-dependent regulatory variants on human  
1128 immune traits. *Genome Biol.* **22**, 122 (2021).
- 1129 2. Mostafavi, H., Spence, J. P., Naqvi, S. & Pritchard, J. K. Systematic differences in  
1130 discovery of genetic effects on gene expression and complex traits. *Nat. Genet.* 1–10  
1131 (2023).
- 1132 3. Yao, D. W., O'Connor, L. J., Price, A. L. & Gusev, A. Quantifying genetic effects on disease  
1133 mediated by assayed gene expression levels. *Nat. Genet.* **52**, 626–633 (2020).
- 1134 4. Strober, B. J. *et al.* Dynamic genetic regulation of gene expression during cellular  
1135 differentiation. *Science* **364**, 1287–1290 (2019).
- 1136 5. Aracena, K. A. *et al.* Epigenetic variation impacts individual differences in the transcriptional  
1137 response to influenza infection. *Nature Genetics* 1–12 (2024).
- 1138 6. Baca, S. C. *et al.* Genetic determinants of chromatin reveal prostate cancer risk mediated  
1139 by context-dependent gene regulation. *Nat. Genet.* (2022) doi:10.1038/s41588-022-01168-  
1140 y.
- 1141 7. Hormozdiari, F. *et al.* Leveraging molecular quantitative trait loci to understand the genetic  
1142 architecture of diseases and complex traits. *Nat. Genet.* **50**, 1041–1047 (2018).
- 1143 8. Finucane, H. K. *et al.* Partitioning heritability by functional annotation using genome-wide  
1144 association summary statistics. *Nat. Genet.* **47**, 1228–1235 (2015).
- 1145 9. Benaglio, P. *et al.* Mapping genetic effects on cell type-specific chromatin accessibility and  
1146 annotating complex immune trait variants using single nucleus ATAC-seq in peripheral  
1147 blood. *PLoS Genet.* **19**, e1010759 (2023).
- 1148 10. You, M. *et al.* Single-cell epigenomic landscape of peripheral immune cells reveals  
1149 establishment of trained immunity in individuals convalescing from COVID-19. *Nat. Cell*  
1150 *Biol.* **23**, 620–630 (2021).



- 1151 11. Hao, Y. *et al.* Integrated analysis of multimodal single-cell data. *Cell* **184**, 3573-3587.e29  
1152 (2021).
- 1153 12. Stephenson, E. *et al.* Single-cell multi-omics analysis of the immune response in COVID-  
1154 19. *Nat. Med.* **27**, 904–916 (2021).
- 1155 13. Zhang, Y. *et al.* Model-based analysis of ChIP-Seq (MACS). *Genome Biol.* **9**, R137 (2008).
- 1156 14. Cheong, J.-G. *et al.* Epigenetic memory of coronavirus infection in innate immune cells and  
1157 their progenitors. *Cell* (2023) doi:10.1016/j.cell.2023.07.019.
- 1158 15. Rubinacci, S., Ribeiro, D. M., Hofmeister, R. J. & Delaneau, O. Efficient phasing and  
1159 imputation of low-coverage sequencing data using large reference panels. *Nat. Genet.* **53**,  
1160 120–126 (2021).
- 1161 16. Bravo González-Blas, C. *et al.* cisTopic: cis-regulatory topic modeling on single-cell ATAC-  
1162 seq data. *Nat. Methods* **16**, 397–400 (2019).
- 1163 17. Kotliar, D. *et al.* Reproducible single cell annotation of programs underlying T-cell subsets,  
1164 activation states, and functions. *bioRxivorg* (2024) doi:10.1101/2024.05.03.592310.
- 1165 18. Carbonetto, P. *et al.* Interpreting structure in sequence count data with differential  
1166 expression analysis allowing for grades of membership. *bioRxiv* 2023.03.03.531029 (2023)  
1167 doi:10.1101/2023.03.03.531029.
- 1168 19. Carbonetto, P., Sarkar, A., Wang, Z. & Stephens, M. Non-negative matrix factorization  
1169 algorithms greatly improve topic model fits. *arXiv [stat.ML]* (2021).
- 1170 20. Granja, J. M. *et al.* ArchR is a scalable software package for integrative single-cell  
1171 chromatin accessibility analysis. *Nat. Genet.* **53**, 403–411 (2021).
- 1172 21. Reshef, Y. A. *et al.* Co-varying neighborhood analysis identifies cell populations associated  
1173 with phenotypes of interest from single-cell transcriptomics. *Nat. Biotechnol.* (2021)  
1174 doi:10.1038/s41587-021-01066-4.

- 1175 22. Dann, E., Henderson, N. C., Teichmann, S. A., Morgan, M. D. & Marioni, J. C. Differential  
1176 abundance testing on single-cell data using k-nearest neighbor graphs. *Nat. Biotechnol.*  
1177 (2021) doi:10.1038/s41587-021-01033-z.
- 1178 23. Lipsky, P. E. Systemic lupus erythematosus: an autoimmune disease of B cell hyperactivity.  
1179 *Nat. Immunol.* **2**, 764–766 (2001).
- 1180 24. Caielli, S., Wan, Z. & Pascual, V. Systemic Lupus Erythematosus Pathogenesis: Interferon  
1181 and Beyond. *Annu. Rev. Immunol.* (2023) doi:10.1146/annurev-immunol-101921-042422.
- 1182 25. Blangy-Letheule, A. *et al.* Value of a secretomic approach for distinguishing patients with  
1183 COVID-19 viral pneumonia among patients with respiratory distress admitted to intensive  
1184 care unit. *J. Med. Virol.* **96**, e29756 (2024).
- 1185 26. Coperchini, F. *et al.* The cytokine storm in COVID-19: Further advances in our  
1186 understanding the role of specific chemokines involved. *Cytokine Growth Factor Rev.* **58**,  
1187 82–91 (2021).
- 1188 27. Cuomo, A. S. E. *et al.* Single-cell RNA-sequencing of differentiating iPS cells reveals  
1189 dynamic genetic effects on gene expression. *Nat. Commun.* **11**, 810 (2020).
- 1190 28. Turner, A. W. *et al.* Single-nucleus chromatin accessibility profiling highlights regulatory  
1191 mechanisms of coronary artery disease risk. *Nat. Genet.* 1–13 (2022).
- 1192 29. Kumasaka, N., Knights, A. J. & Gaffney, D. J. High-resolution genetic mapping of putative  
1193 causal interactions between regions of open chromatin. *Nat. Genet.* **51**, 128–137 (2019).
- 1194 30. Schmiedel, B. J. *et al.* Impact of Genetic Polymorphisms on Human Immune Cell Gene  
1195 Expression. *Cell* **175**, 1701-1715.e16 (2018).
- 1196 31. Giambartolomei, C. *et al.* Bayesian test for colocalisation between pairs of genetic  
1197 association studies using summary statistics. *PLoS Genet.* **10**, e1004383 (2014).
- 1198 32. Gusev, A. *et al.* Integrative approaches for large-scale transcriptome-wide association  
1199 studies. *Nat. Genet.* **48**, 245–252 (2016).

- 1200 33. Gamazon, E. R. *et al.* A gene-based association method for mapping traits using reference  
1201 transcriptome data. *Nat. Genet.* **47**, 1091–1098 (2015).
- 1202 34. Uebachs, S. M., Wang, G., Carbonetto, P. & Stephens, M. Flexible statistical methods for  
1203 estimating and testing effects in genomic studies with multiple conditions. *Nat. Genet.* **51**,  
1204 187–195 (2019).
- 1205 35. Han, B. & Eskin, E. Random-effects model aimed at discovering associations in meta-  
1206 analysis of genome-wide association studies. *Am. J. Hum. Genet.* **88**, 586–598 (2011).
- 1207 36. Nathan, A. *et al.* Single-cell eQTL models reveal dynamic T cell state dependence of  
1208 disease loci. *Nature* 2021.07.29.454316 (2022).
- 1209 37. Yazar, S. *et al.* Single-cell eQTL mapping identifies cell type–specific genetic control of  
1210 autoimmune disease. *Science* **376**, eabf3041 (2022).
- 1211 38. Randolph, H. E. *et al.* Genetic ancestry effects on the response to viral infection are  
1212 pervasive but cell type specific. *Science* **374**, 1127–1133 (2021).
- 1213 39. Banovich, N. E. *et al.* Impact of regulatory variation across human iPSCs and differentiated  
1214 cells. *Genome Res.* **28**, 122–131 (2018).
- 1215 40. Natri, H. M. *et al.* Cell-type-specific and disease-associated expression quantitative trait loci  
1216 in the human lung. *Nat. Genet.* **56**, 595–604 (2024).
- 1217 41. Nasser, J. *et al.* Genome-wide enhancer maps link risk variants to disease genes. *Nature*  
1218 **593**, 238–243 (2021).
- 1219 42. Cruz-Guilloty, F. *et al.* Runx3 and T-box proteins cooperate to establish the transcriptional  
1220 program of effector CTLs. *J. Exp. Med.* **206**, 51–59 (2009).
- 1221 43. Wang, D. *et al.* The transcription factor Runx3 establishes chromatin accessibility of cis-  
1222 regulatory landscapes that drive memory cytotoxic T lymphocyte formation. *Immunity* **48**,  
1223 659-674.e6 (2018).
- 1224 44. McLane, L. M. *et al.* Role of nuclear localization in the regulation and function of T-bet and  
1225 Eomes in exhausted CD8 T cells. *Cell Rep.* **35**, 109120 (2021).

- 1226 45. Alasoo, K. *et al.* Shared genetic effects on chromatin and gene expression indicate a role  
1227 for enhancer priming in immune response. *Nat. Genet.* **50**, 424–431 (2018).
- 1228 46. Ishigaki, K. *et al.* Multi-ancestry genome-wide association analyses identify novel genetic  
1229 mechanisms in rheumatoid arthritis. *Nature Genetics* 1–12 (2022).
- 1230 47. Zhu, Y. *et al.* Identification of CD112R as a novel checkpoint for human T cells. *J. Exp.*  
1231 *Med.* **213**, 167–176 (2016).
- 1232 48. Fair, B. *et al.* Global impact of unproductive splicing on human gene expression. *Nat.*  
1233 *Genet.* **56**, 1851–1861 (2024).
- 1234 49. Liu, H. *et al.* Epigenomic and transcriptomic analyses define core cell types, genes and  
1235 targetable mechanisms for kidney disease. *Nat. Genet.* 1–13 (2022).
- 1236 50. Galloway, A. *et al.* RNA-binding proteins ZFP36L1 and ZFP36L2 promote cell quiescence.  
1237 *Science* **352**, 453–459 (2016).
- 1238 51. Hodson, D. J. *et al.* Deletion of the RNA-binding proteins ZFP36L1 and ZFP36L2 leads to  
1239 perturbed thymic development and T lymphoblastic leukemia. *Nat. Immunol.* **11**, 717–724  
1240 (2010).
- 1241 52. Son, Y.-O., Kim, H.-E., Choi, W.-S., Chun, C.-H. & Chun, J.-S. RNA-binding protein  
1242 ZFP36L1 regulates osteoarthritis by modulating members of the heat shock protein 70  
1243 family. *Nat. Commun.* **10**, 77 (2019).
- 1244 53. Olsson, L. M. *et al.* A case-control study of rheumatoid arthritis identifies an associated  
1245 single nucleotide polymorphism in the NCF4 gene, supporting a role for the NADPH-  
1246 oxidase complex in autoimmunity. *Arthritis Res. Ther.* **9**, R98 (2007).
- 1247 54. Wysocki, T. *et al.* Gene expression analysis of anti-TNF-treated rheumatoid arthritis  
1248 patients reveals the links between NADPH oxidase expression profile and  
1249 immunophenotypic changes in peripheral blood mononuclear cells. *Research Square*  
1250 (2024) doi:10.21203/rs.3.rs-4006503/v1.

- 1251 55. Li, L. *et al.* NCF4 attenuates colorectal cancer progression by modulating inflammasome  
1252 activation and immune surveillance. *Nat. Commun.* **15**, 5170 (2024).
- 1253 56. Gazal, S. *et al.* Combining SNP-to-gene linking strategies to identify disease genes and  
1254 assess disease omnigenicity. *Nat. Genet.* 1–10 (2022).
- 1255 57. Zhernakova, A. *et al.* Genetic analysis of innate immunity in Crohn’s disease and ulcerative  
1256 colitis identifies two susceptibility loci harboring CARD9 and IL18RAP. *Am. J. Hum. Genet.*  
1257 **82**, 1202–1210 (2008).
- 1258 58. Luo, P., Yang, Z., Chen, B. & Zhong, X. The multifaceted role of CARD9 in inflammatory  
1259 bowel disease. *J. Cell. Mol. Med.* **24**, 34–39 (2020).
- 1260 59. Rivas, M. A. *et al.* Deep resequencing of GWAS loci identifies independent rare variants  
1261 associated with inflammatory bowel disease. *Nat. Genet.* **43**, 1066–1073 (2011).
- 1262 60. Zhou, W. *et al.* Efficient and accurate mixed model association tool for single-cell eQTL  
1263 analysis. *bioRxiv* 2024.05.15.24307317 (2024) doi:10.1101/2024.05.15.24307317.
- 1264 61. Aguet, F. *et al.* Molecular quantitative trait loci. *Nature Reviews Methods Primers* **3**, 1–22  
1265 (2023).
- 1266 62. Weinand, K. *et al.* The chromatin landscape of pathogenic transcriptional cell states in  
1267 rheumatoid arthritis. *Nat. Commun.* **15**, 4650 (2024).
- 1268 63. Raychaudhuri, S. *et al.* Modeling heterogeneity in single-cell perturbation states enhances  
1269 detection of response eQTLs. *bioRxiv* 2024.02.20.581100 (2024)  
1270 doi:10.1101/2024.02.20.581100.
- 1271 64. Xiao, Q. *et al.* Immunosuppression causes dynamic changes in expression QTLs in  
1272 psoriatic skin. *Nat. Commun.* **14**, 6268 (2023).
- 1273 65. Umans, B. D. & Gilad, Y. Oxygen-induced stress reveals context-specific gene regulatory  
1274 effects in human brain organoids. *bioRxiv* (2024) doi:10.1101/2024.09.03.611030.

- 1275 66. Popp, J. M. *et al.* Cell-type and dynamic state govern genetic regulation of gene expression  
1276 in heterogeneous differentiating cultures. *bioRxiv* 2024.05.02.592174 (2024)  
1277 doi:10.1101/2024.05.02.592174.
- 1278 67. van de Geijn, B., McVicker, G., Gilad, Y. & Pritchard, J. K. WASP: allele-specific software  
1279 for robust molecular quantitative trait locus discovery. *Nat. Methods* **12**, 1061–1063 (2015).
- 1280 68. Thibodeau, A. *et al.* AMULET: a novel read count-based method for effective multipler  
1281 detection from single nucleus ATAC-seq data. *Genome Biol.* **22**, 252 (2021).
- 1282 69. Haghverdi, L., Lun, A. T. L., Morgan, M. D. & Marioni, J. C. Batch effects in single-cell RNA-  
1283 sequencing data are corrected by matching mutual nearest neighbors. *Nat. Biotechnol.* **36**,  
1284 421–427 (2018).
- 1285 70. Ramírez, F. *et al.* deepTools2: a next generation web server for deep-sequencing data  
1286 analysis. *Nucleic acids research* **44**, W160–W165 (2016).
- 1287 71. Loh, P.-R. *et al.* Reference-based phasing using the Haplotype Reference Consortium  
1288 panel. *Nat. Genet.* **48**, 1443–1448 (2016).
- 1289 72. Das, S. *et al.* Next-generation genotype imputation service and methods. *Nat. Genet.* **48**,  
1290 1284–1287 (2016).
- 1291 73. Gu, Z. Complex heatmap visualization. *Imeta* **1**, (2022).
- 1292 74. Delaneau, O. *et al.* A complete tool set for molecular QTL discovery and analysis. *Nat.*  
1293 *Commun.* **8**, 15452 (2017).
